# Supplementary material for: Emotions and decisions in the real world: What can we learn from quasi-field experiments?
Source: PLoS One. 2020 Dec 16;15(12):e0243044. doi: 10.1371/journal.pone.0243044 (PMC7744061; doi:10.1371/journal.pone.0243044)
Supplement: S1 File — (CSV) [file pone.0243044.s007.csv]

participantid	surveynum	team	percentwatched	ownscore	opponentscore	betspread	gameendtime	surveystarttime	surveyendtime	e_excited	e_happy	e_sad	e_nervous	e_angry	e_disappointed	e_proud	female	age30up	hhincome	educ_highschool	educ_somecollege	educ_collegedegree	educ_graddegree	fanlevel	myteamtv	myteamlive	allteamslive	elose_sad	elose_angry	elose_disappointed	elose_frustrated	adjustedpumps	totalpumps_week	riskaversion	winnings	e_negemotion	winmargin	winmargin7	expectedoutcome	elimination	baseline	scorediff	teamwon	teamlost	wonscore	spreadperf	exceedsexp	underdog	favorite
101	0	Jets								50	50	33	16	50	83		0	0	30	0	0	0	1	4	16	3	3	50	75	100	100	2	4	0	3	54.136467	0				1		0		0
101	1	Jets	75	17	27	3	23dec2012 16:18:46	23dec2012 16:28:05	23dec2012 16:34:57	15	20	58	29	65	98	4	0	0	30	0	0	0	1	4	16	3	3	50	75	100	100	.66666669	2	0	5	76.267273	-10	-14	Even Match	0	0	-10	0	1	0	-13	0	0	1
102	0	Bengals								33	0	0	0	0	16		0	1	50	0	0	0	1	4	12	1	1	75	75	100	100	3	8	-.083333336	4	31.461128	0				1		0		0
103	0	Texans								66	66	0	66	0	50		0	1	100	0	0	0	1	2	4	0	1	25	25	25	25		16	-.28867513	8	22.32238	0				1		0		0
103	1	Texans	5	6	23	7.5	23dec2012 15:52:33	23dec2012 15:55:30	23dec2012 16:00:31	0	0	18	4	2	14	2	0	1	100	0	0	0	1	2	4	0	1	25	25	25	25		5	0	0	38.841492	-17	-21	Predicted Win	0	0	-17	0	1	0	-24.5	0	0	1
103	3	Texans	100	19	13	4	05jan2013 19:43:23	05jan2013 19:46:13	05jan2013 19:49:20	58	58	0	0	0	0	56	0	1	100	0	0	0	1	2	4	0	1	25	25	25	25	.5	2	-.33333334	6	13.430354	6	0	Even Match	1	0	6	1	0	6	2	1	0	1
103	4	Texans	50	28	41	-9.5	13jan2013 19:57:43	13jan2013 19:56:56	13jan2013 19:59:50	0	0	54	0	0	59	0	0	1	100	0	0	0	1	2	4	0	1	25	25	25	25	.5	2	-.28867513	5	57.280746	-13	-14	Predicted Loss	1	0	-13	0	1	0	-3.5	0	1	0
104	0	Vikings								66	50	50	50	50	66		0	1	50	0	0	0	1	3	16	3	3	50	75	75	75	3	5	-.083333336	4	52.155819	0				1		0		0
104	1	Vikings	100	23	6	-7.5	23dec2012 15:52:33	23dec2012 15:57:07	23dec2012 16:00:56	90	93	7	20	19	14	64	0	1	50	0	0	0	1	3	16	3	3	50	75	75	75		5	0	0	12.167446	17	14	Predicted Loss	0	0	17	1	0	17	24.5	1	1	0
104	2	Vikings	100	37	34	-3	30dec2012 19:45:44	30dec2012 19:54:16	30dec2012 19:57:43	98	100	19	20	0	1	93	0	1	50	0	0	0	1	3	16	3	3	50	75	75	75	3	5	-.63245553	5	5.3460851	3	0	Even Match	0	0	3	1	0	3	6	1	1	0
104	3	Vikings	100	10	24	-11	05jan2013 23:06:32	05jan2013 23:06:17	05jan2013 23:09:30	14	10	66	8	41	91	4	0	1	50	0	0	0	1	3	16	3	3	50	75	75	75	2	5	-.51639777	10	73.322174	-14	-14	Predicted Loss	1	0	-14	0	1	0	-3	0	1	0
105	0	Cowboys								0	50	33	33	33	50		0	0	50	0	0	1	0	4	16	0	0	75	75	75	100	0	2	.094491117	1	47.413067	0				1		0		0
105	1	Cowboys	100	31	34	3	23dec2012 16:38:26	23dec2012 16:43:45	23dec2012 16:46:08	0	0	40	17	87	100	0	0	0	50	0	0	1	0	4	16	0	0	75	75	75	100	1	4	0	4	83.218285	-3	-7	Even Match	0	0	-3	0	1	0	-6	0	0	1
105	2	Cowboys	100	18	28	-3	30dec2012 23:28:33	30dec2012 23:30:15	30dec2012 23:31:40	0	0	68	1	94	97	0	0	0	50	0	0	1	0	4	16	0	0	75	75	75	100		4	-.35355338	0	90.611343	-10	-14	Even Match	1	0	-10	0	1	0	-7	0	1	0
106	0	Dolphins								83	66	0	16	0	0		0	0	30	0	0	1	0	3	16	0	3	75	75	75	75	4	9	-.19364917	10	9.1823826	0				1		0		0
106	1	Dolphins	100	24	10	4.5	23dec2012 16:14:24	23dec2012 16:17:13	23dec2012 16:20:20	50	90	0	0	0	0	75	0	0	30	0	0	1	0	3	16	0	3	75	75	75	75		15	-.28867513	8	7.7540522	14	14	Even Match	0	0	14	1	0	14	9.5	1	0	1
107	0	Patriots								50	100	0	16	0	0		0	0	100	0	1	0	0	4	12	3	3	100	75	100	100	4	7	-.15811388	5	5.6109705	0				1		0		0
107	1	Patriots	100	23	16	14	23dec2012 16:05:39	23dec2012 16:07:23	23dec2012 16:09:49	46	50	64	74	63	78	35	0	0	100	0	1	0	0	4	12	3	3	100	75	100	100		5	0	0	62.949448	7	7	Predicted Win	0	0	7	1	0	7	-7	0	0	1
107	2	Patriots	50	28	0	11.5	30dec2012 19:23:53	30dec2012 19:23:58	30dec2012 19:27:49	78	66	33	30	25	19	88	0	0	100	0	1	0	0	4	12	3	3	100	75	100	100	0	1	-.16666667	4	27.245781	28	28	Predicted Win	0	0	28	1	0	28	16.5	1	0	1
107	4	Patriots	100	41	28	9.5	13jan2013 19:57:43	13jan2013 20:00:36	13jan2013 20:03:56	88	94	1	9	10	8	98	0	0	100	0	1	0	0	4	12	3	3	100	75	100	100	.33333334	1	-.30151135	8	7.4314251	13	7	Predicted Win	1	0	13	1	0	13	3.5	1	0	1
107	5	Patriots	100	13	28	7.5	20jan2013 21:48:34	20jan2013 21:53:42	20jan2013 21:56:39	2	4	98	25	99	99	40	0	0	100	0	1	0	0	4	12	3	3	100	75	100	100	.5	2	-.33333334	6	97.885666	-15	-21	Predicted Win	1	0	-15	0	1	0	-22.5	0	0	1
109	0	Patriots								0	0	0	0	0	0		0	1	100	0	0	1	0	4	16	7	12	100	100	100	100	2.5	11	-.28867513	7	30.997232	0				1		0		0
110	0	Cowboys								50	50	0	0	0	66		0	0	30	0	0	1	0	4	12	3	3	75	50	100	50	2	6	-.072168782	3	31.433109	0				1		0		0
110	1	Cowboys	100	31	34	3	23dec2012 16:38:26	23dec2012 16:39:35	23dec2012 16:43:26	0	0	91	0	54	86	0	0	0	30	0	0	1	0	4	12	3	3	75	50	100	50	3	7	-.13867505	8	84.278809	-3	-7	Even Match	0	0	-3	0	1	0	-6	0	0	1
110	2	Cowboys	100	18	28	-3	30dec2012 23:28:33	30dec2012 23:30:45	30dec2012 23:34:46	0	0	91	0	71	97	0	0	0	30	0	0	1	0	4	12	3	3	75	50	100	50	2	6	-.53452247	14	90.703033	-10	-14	Even Match	1	0	-10	0	1	0	-7	0	1	0
112	0	Patriots								66	66	16	50	0	50		0	1	100	0	0	0	1	3	16	1	1	75	75	100	75	1	3	.094491117	2	26.101719	0				1		0		0
112	1	Patriots	75	23	16	14	23dec2012 16:05:39	23dec2012 16:06:59	23dec2012 16:13:17	70	50	0	100	50	75	70	0	1	100	0	0	0	1	3	16	1	1	75	75	100	75	3	7	-.083333336	8	42.068314	7	7	Predicted Win	0	0	7	1	0	7	-7	0	0	1
112	2	Patriots	100	28	0	11.5	30dec2012 19:23:53	30dec2012 19:33:52	30dec2012 19:39:13	100	74	0	60	0	0	95	0	1	100	0	0	0	1	3	16	1	1	75	75	100	75	0	1	-.30151135	4	5.5306239	28	28	Predicted Win	0	0	28	1	0	28	16.5	1	0	1
112	4	Patriots	100	41	28	9.5	13jan2013 19:57:43	13jan2013 20:00:51	13jan2013 20:05:47	100	100	0	30	0	0	90	0	1	100	0	0	0	1	3	16	1	1	75	75	100	75	.5	3	-.33333334	6	.48779088	13	7	Predicted Win	1	0	13	1	0	13	3.5	1	0	1
112	5	Patriots	100	13	28	7.5	20jan2013 21:48:34	20jan2013 21:59:06	20jan2013 22:04:28	50	0	80	0	66	100	30	0	1	100	0	0	0	1	3	16	1	1	75	75	100	75	.66666669	2	-.28867513	9	82.748726	-15	-21	Predicted Win	1	0	-15	0	1	0	-22.5	0	0	1
113	0	Lions								33	0	50	0	66	100		0	0	50	0	0	1	0	4	16	3	7	50	100	75	100		4	0	0	77.590889	0				1		0		0
113	1	Lions	100	18	31	-3.5	22dec2012 23:38:15	22dec2012 23:40:09	22dec2012 23:43:12	18	14	57	20	100	89	21	0	0	50	0	0	1	0	4	16	3	7	50	100	75	100		5	-.083333336	0	82.774529	-13	-14	Even Match	0	0	-13	0	1	0	-9.5	0	1	0
114	0	Bears								66	83	0	16	0	0		0	1	75	0	0	1	0	4	16	0	0	75	75	75	75	4	12	-.15811388	10	7.4468732	0				1		0		0
114	2	Bears	100	26	24	3	30dec2012 16:05:06	30dec2012 16:07:35	30dec2012 16:12:48	48	52	6	21	2	5	71	0	1	75	0	0	1	0	4	16	0	0	75	75	75	75		3	-.35355338	0	18.497486	2	0	Even Match	0	0	2	1	0	2	-1	0	0	1
115	0	Packers								100	0	0	0	0	0		0	0	100	0	1	0	0	1	16	3	3	100	100	100	100	4	14	-.28867513	10	20.957809	0				1		0		0
115	1	Packers	100	55	7	10.5	23dec2012 16:12:13	23dec2012 16:11:55	23dec2012 16:17:04	100	100	0	39	31	22	100	0	0	100	0	1	0	0	1	16	3	3	100	100	100	100	4	12	-.19364917	15	12.594262	48	42	Predicted Win	0	0	48	1	0	48	37.5	1	0	1
115	2	Packers	100	34	37	3	30dec2012 19:45:44	30dec2012 19:45:38	30dec2012 19:49:15	7	16	94	92	89	98	8	0	0	100	0	1	0	0	1	16	3	3	100	100	100	100	3	9	-1.0327955	5	91.055862	-3	-7	Even Match	0	0	-3	0	1	0	-6	0	0	1
115	3	Packers	100	24	10	11	05jan2013 23:06:32	05jan2013 23:15:29	05jan2013 23:16:54	97	81	7	81	11	10	84	0	0	100	0	1	0	0	1	16	3	3	100	100	100	100		5	-.5	0	10.698196	14	14	Predicted Win	1	0	14	1	0	14	3	1	0	1
115	4	Packers	100	31	45	-3	12jan2013 23:36:34	12jan2013 23:38:23	12jan2013 23:40:16	10	3	99	39	95	99	5	0	0	100	0	1	0	0	1	16	3	3	100	100	100	100	3	6	-.40089187	5	96.509735	-14	-14	Even Match	1	0	-14	0	1	0	-11	0	1	0
116	0	Packers								83	83	0	50	0	0		0	0	75	0	0	0	1	4	16	3	3	50	50	75	75	3.5	10	-.13363062	9	5.4888864	0				1		0		0
116	1	Packers	100	55	7	10.5	23dec2012 16:12:13	23dec2012 16:12:40	23dec2012 16:20:41	95	90	0	0	0	5	100	0	0	75	0	0	0	1	4	16	3	3	50	50	75	75	3	7	-.083333336	4	4.4165959	48	42	Predicted Win	0	0	48	1	0	48	37.5	1	0	1
116	2	Packers	100	34	37	3	30dec2012 19:45:44	30dec2012 19:45:55	30dec2012 19:54:29	0	0	1	25	50	90	1	0	0	75	0	0	0	1	4	16	3	3	50	50	75	75	1	3	-.2773501	6	63.544029	-3	-7	Even Match	0	0	-3	0	1	0	-6	0	0	1
116	4	Packers	100	31	45	-3	12jan2013 23:36:34	12jan2013 23:37:34	12jan2013 23:40:00	0	0	75	0	95	100	0	0	0	75	0	0	0	1	4	16	3	3	50	50	75	75		6	-.35355338	0	93.153786	-14	-14	Even Match	1	0	-14	0	1	0	-11	0	1	0
117	0	Eagles								0	0	0	0	0	0		1	1	75	0	0	0	1	4	16	1	1	25	75	75	75		7	-.083333336	0	30.997232	0				1		0		0
117	1	Eagles	100	20	27	-4.5	23dec2012 15:59:06	23dec2012 16:00:29	23dec2012 16:04:31	0	0	0	0	4	47	0	1	1	75	0	0	0	1	4	16	1	1	25	75	75	75	2	4	0	3	42.992504	-7	-7	Even Match	0	0	-7	0	1	0	-2.5	0	1	0
118	0	Vikings								50	83	0	0	0	66		0	1	100	0	1	0	0	4	16	3	3	100	75	100	100		11	-.28867513	0	24.751171	0				1		0		0
118	2	Vikings	100	37	34	-3	30dec2012 19:45:44	30dec2012 19:47:37	30dec2012 19:50:46	100	100	31	0	33	33	100	0	1	100	0	1	0	0	4	16	3	3	100	75	100	100	1.3333334	4	-.26726124	11	23.022789	3	0	Even Match	0	0	3	1	0	3	6	1	1	0
118	3	Vikings	100	10	24	-11	05jan2013 23:06:32	05jan2013 23:07:02	05jan2013 23:11:45	0	0	48	0	70	100	0	0	1	100	0	1	0	0	4	16	3	3	100	75	100	100	2.5	8	-.83205032	12	81.34687	-14	-14	Predicted Loss	1	0	-14	0	1	0	-3	0	1	0
119	0	Broncos								100	100	0	0	0	0		0	1	100	0	0	1	0	3	16	0	0	75	50	0	0	3	6	-.083333336	4	.70951116	0				1		0		0
119	1	Broncos	75	34	12	11	23dec2012 19:13:32	23dec2012 19:14:49	23dec2012 19:17:24	25	75	0	0	0	0	0	0	1	100	0	0	1	0	3	16	0	0	75	50	0	0		5	0	0	13.301152	22	21	Predicted Win	0	0	22	1	0	22	11	1	0	1
119	2	Broncos	75	38	3	17	30dec2012 19:15:09	30dec2012 19:16:43	30dec2012 19:19:36	50	100	0	0	0	0	0	0	1	100	0	0	1	0	3	16	0	0	75	50	0	0	.66666669	2	-.13867505	8	5.7292218	35	35	Predicted Win	0	0	35	1	0	35	18	1	0	1
119	4	Broncos	100	35	38	9	12jan2013 20:48:21	12jan2013 20:53:40	12jan2013 20:56:20	15	0	0	0	33	33	0	0	1	100	0	0	1	0	3	16	0	0	75	50	0	0	0	0	-.15075567	6	44.711239	-3	-7	Predicted Win	1	0	-3	0	1	0	-12	0	0	1
120	0	Cowboys								0	50	0	0	0	0		0	1	50	0	0	1	0	4	16	0	0	25	50	100	100	3	5	-.083333336	4	20.873081	0				1		0		0
120	1	Cowboys	100	31	34	3	23dec2012 16:38:26	23dec2012 16:43:05	23dec2012 16:46:17	70	49	71	59	1	70	50	0	1	50	0	0	1	0	4	16	0	0	25	50	100	100	4	6	-.15811388	5	46.607113	-3	-7	Even Match	0	0	-3	0	1	0	-6	0	0	1
120	2	Cowboys	75	18	28	-3	30dec2012 23:28:33	30dec2012 23:37:35	30dec2012 23:40:34	0	0	24	0	0	81	0	0	1	50	0	0	1	0	4	16	0	0	25	50	100	100	1	9	-.34668761	13	55.609451	-10	-14	Even Match	1	0	-10	0	1	0	-7	0	1	0
121	0	Lions								50	66	0	0	0	0		0	0	50	0	0	1	0	2	4	0	0	50	0	50	25	3	8	-.083333336	8	12.613643	0				1		0		0
121	1	Lions	5	18	31	-3.5	22dec2012 23:38:15	22dec2012 23:39:31	22dec2012 23:42:32	24	18	15	7	7	51	6	0	0	50	0	0	1	0	2	4	0	0	50	0	50	25	3	6	-.083333336	4	41.938572	-13	-14	Even Match	0	0	-13	0	1	0	-9.5	0	1	0
122	0	Patriots								83	83	0	50	0	16		0	1	50	0	0	1	0	2	8	0	0	0	0	75	25	3.5	10	-.13363062	9	9.2657928	0				1		0		0
122	1	Patriots	5	23	16	14	23dec2012 16:05:39	23dec2012 16:12:56	23dec2012 16:18:54	61	87	6	8	9	7	57	0	1	50	0	0	1	0	2	8	0	0	0	0	75	25	3	5	-.083333336	4	12.249721	7	7	Predicted Win	0	0	7	1	0	7	-7	0	0	1
122	2	Patriots	5	28	0	11.5	30dec2012 19:23:53	30dec2012 19:26:33	30dec2012 19:30:13	87	56	33	42	3	27	34	0	1	50	0	0	1	0	2	8	0	0	0	0	75	25	2.5	6	-.5	11	25.213459	28	28	Predicted Win	0	0	28	1	0	28	16.5	1	0	1
122	4	Patriots	75	41	28	9.5	13jan2013 19:57:43	13jan2013 20:15:20	13jan2013 20:17:37	91	88	3	44	1	11	89	0	1	50	0	0	1	0	2	8	0	0	0	0	75	25	2	5	-.51639777	4	7.2258921	13	7	Predicted Win	1	0	13	1	0	13	3.5	1	0	1
122	5	Patriots	75	13	28	7.5	20jan2013 21:48:34	20jan2013 21:55:59	20jan2013 22:00:13	46	53	32	16	3	59	21	0	1	50	0	0	1	0	2	8	0	0	0	0	75	25	1.5	4	-.2773501	8	37.454224	-15	-21	Predicted Win	1	0	-15	0	1	0	-22.5	0	0	1
123	0	Broncos								66	66	16	33	0	16		0	1	30	0	0	0	1	3	12	0	0	25	25	75	50	2.5	7	-.072168782	7	18.201435	0				1		0		0
123	1	Broncos	75	34	12	11	23dec2012 19:13:32	23dec2012 19:14:51	23dec2012 19:18:54	75	80	5	40	0	1	65	0	1	30	0	0	0	1	3	12	0	0	25	25	75	50	2	6	0	6	8.3535442	22	21	Predicted Win	0	0	22	1	0	22	11	1	0	1
124	0	Giants								0	50	0	0	0	0		0	1	100	0	0	1	0	4	16	3	3	50	25	50	75	0	2	.094491117	1	20.873081	0				1		0		0
124	1	Giants	100	14	33	2.5	23dec2012 19:31:00	23dec2012 19:35:06	23dec2012 19:40:06	0	2	56	73	13	93	1	0	1	100	0	0	1	0	4	16	3	3	50	25	50	75	.5	2	.088388346	3	67.746811	-19	-21	Even Match	0	0	-19	0	1	0	-21.5	0	0	1
124	2	Giants	100	42	7	6.5	30dec2012 15:51:59	30dec2012 15:57:22	30dec2012 16:01:21	57	81	39	30	31	70	50	0	1	100	0	0	1	0	4	16	3	3	50	25	50	75	0	3	-.45226702	2	41.079529	35	35	Even Match	0	0	35	1	0	35	28.5	1	0	1
125	0	Eagles								50	83	0	16	0	0		0	0	75	0	0	1	0	3	12	1	1	50	50	75	75	4.5	16	-.22613351	19	9.0531816	0				1		0		0
125	1	Eagles	75	20	27	-4.5	23dec2012 15:59:06	23dec2012 15:59:53	23dec2012 16:07:23	0	0	0	0	82	63	0	0	0	75	0	0	1	0	3	12	1	1	50	50	75	75	4.5	10	-.1875	11	64.331345	-7	-7	Even Match	0	0	-7	0	1	0	-2.5	0	1	0
126	0	Steelers								0	50	0	0	0	0		0	0	100	0	0	1	0	3	12	0	0	50	50	75	50	1	4	0	2	20.873081	0				1		0		0
128	0	Bears								0	33	0	0	0	0		0	1	100	0	0	0	1	4	16	3	3	100	50	100	100	2	7	-.072168782	3	24.315292	0				1		0		0
128	1	Bears	75	28	13	7	23dec2012 19:35:22	23dec2012 19:33:55	23dec2012 19:38:31	25	76	0	0	0	24	0	0	1	100	0	0	0	1	4	16	3	3	100	50	100	100	2	5	0	3	18.764029	15	14	Even Match	0	0	15	1	0	15	8	1	0	1
128	2	Bears	75	26	24	3	30dec2012 16:05:06	30dec2012 16:05:50	30dec2012 16:11:28	14	62	0	0	0	0	0	0	1	100	0	0	0	1	4	16	3	3	100	50	100	100	.66666669	2	-.28867513	9	17.037767	2	0	Even Match	0	0	2	1	0	2	-1	0	0	1
129	0	Steelers								0	0	0	0	0	0		0	1	30	0	0	1	0	4	16	3	3	25	50	100	50	2	5	0	3	30.997232	0				1		0		0
129	1	Steelers	100	10	13	3	23dec2012 16:18:46	23dec2012 16:20:15	23dec2012 16:27:31	0	0	4	0	12	69	0	0	1	30	0	0	1	0	4	16	3	3	25	50	100	50	2	6	0	9	50.902248	-3	-7	Even Match	0	0	-3	0	1	0	-6	0	0	1
130	0	Patriots								33	33	50	33	16	50		0	0	75	0	0	0	1	4	16	0	0	50	75	75	25	3	8	-.083333336	4	47.604572	0				1		0		0
130	1	Patriots	50	23	16	14	23dec2012 16:05:39	23dec2012 16:07:19	23dec2012 16:10:15	63	60	0	25	3	0	58	0	0	75	0	0	0	1	4	16	0	0	50	75	75	25	2	6	0	6	13.014107	7	7	Predicted Win	0	0	7	1	0	7	-7	0	0	1
130	2	Patriots	75	28	0	11.5	30dec2012 19:23:53	30dec2012 19:29:06	30dec2012 19:32:30	74	78	7	41	3	0	74	0	0	75	0	0	0	1	4	16	0	0	50	75	75	25	.66666669	2	-.2773501	8	9.7485523	28	28	Predicted Win	0	0	28	1	0	28	16.5	1	0	1
130	4	Patriots	100	41	28	9.5	13jan2013 19:57:43	13jan2013 19:56:52	13jan2013 20:00:19	82	100	4	7	10	6	70	0	0	75	0	0	0	1	4	16	0	0	50	75	75	25	.66666669	2	-.28867513	9	7.0480137	13	7	Predicted Win	1	0	13	1	0	13	3.5	1	0	1
130	5	Patriots	100	13	28	7.5	20jan2013 21:48:34	20jan2013 22:01:43	20jan2013 22:03:16	1	1	58	3	86	100	1	0	0	75	0	0	0	1	4	16	0	0	50	75	75	25	1.5	4	-.28867513	7	86.912453	-15	-21	Predicted Win	1	0	-15	0	1	0	-22.5	0	0	1
132	0	Steelers								66	66	0	50	0	16		0	1	30	0	0	1	0	4	16	7	12	100	50	100	75		5	0	0	14.414706	0				1		0		0
132	1	Steelers	100	10	13	3	23dec2012 16:18:46	23dec2012 16:16:03	23dec2012 16:19:53	3	9	21	47	91	84	15	0	1	30	0	0	1	0	4	16	7	12	100	50	100	75	.66666669	2	.083333336	5	73.6492	-3	-7	Even Match	0	0	-3	0	1	0	-6	0	0	1
133	0	Steelers								33	83	16	0	0	0		0	1	100	0	0	1	0	4	16	7	7	50	75	100	75	4	6	-.15811388	5	14.539224	0				1		0		0
133	1	Steelers	100	10	13	3	23dec2012 16:18:46	23dec2012 16:16:16	23dec2012 16:18:36	0	0	100	0	100	100	0	0	1	100	0	0	1	0	4	16	7	7	50	75	100	75		4	0	0	100	-3	-7	Even Match	0	0	-3	0	1	0	-6	0	0	1
134	0	49ers								0	50	0	0	0	50		0	0	30	0	0	0	1	3	8	0	0	0	0	75	50	4	6	-.15811388	5	32.675915	0				1		0		0
134	4	49ers	100	45	31	3	12jan2013 23:36:34	12jan2013 23:45:07	12jan2013 23:48:52	70	70	0	0	0	0	40	0	0	30	0	0	0	1	3	8	0	0	0	0	75	50	0	4	-.33333334	2	9.7958279	14	14	Even Match	1	0	14	1	0	14	11	1	0	1
134	6	49ers	100	31	34	4.5	03feb2013 22:46:25	03feb2013 22:48:17	03feb2013 22:52:15	0	0	15	0	10	100	20	0	0	30	0	0	0	1	3	8	0	0	0	0	75	50	0	3	-.33333334	2	60.286694	-3	-7	Even Match	1	0	-3	0	1	0	-7.5	0	0	1
135	0	Redskins								16	83	0	0	16	50		0	0	50	0	0	0	1	4	12	3	3	100	75	100	100	3	5	-.083333336	4	27.990116	0				1		0		0
135	1	Redskins	100	27	20	4.5	23dec2012 15:59:06	23dec2012 16:01:35	23dec2012 16:03:34	99	100	0	14	0	1	58	0	0	50	0	0	0	1	4	12	3	3	100	75	100	100	1	3	0	4	.94249028	7	7	Even Match	0	0	7	1	0	7	2.5	1	0	1
135	3	Redskins	100	14	24	-3	06jan2013 19:34:15	06jan2013 19:50:11	06jan2013 19:52:01	0	1	100	80	41	93	87	0	0	50	0	0	0	1	4	12	3	3	100	75	100	100	.66666669	2	-.28867513	9	84.269836	-10	-14	Even Match	1	0	-10	0	1	0	-7	0	1	0
136	0	Falcons								16	0	66	16	33	50		0	0	75	0	0	1	0	3	12	3	3	75	25	75	50	3	9	-.083333336	8	63.607544	0				1		0		0
137	0	Bears								50	83	0	0	0	16		0	0	75	0	0	1	0	4	16	3	3	50	50	100	75	4	9	-.15811388	10	12.948339	0				1		0		0
137	2	Bears	100	26	24	3	30dec2012 16:05:06	30dec2012 16:06:37	30dec2012 16:14:25	66	88	0	13	0	15	21	0	0	75	0	0	1	0	4	16	3	3	50	50	100	75	0	3	-.33333334	2	9.9974813	2	0	Even Match	0	0	2	1	0	2	-1	0	0	1
138	0	Chargers								50	100	0	0	0	16		0	1	100	0	0	1	0	3	16	1	3	100	50	75	75		6	-.083333336	0	9.5061283	0				1		0		0
138	1	Chargers	100	27	17	-3	23dec2012 16:18:46	23dec2012 16:30:00	23dec2012 16:33:12	97	55	8	8	3	3	60	0	1	100	0	0	1	0	3	16	1	3	100	50	75	75	.66666669	2	.079056941	5	13.277475	10	7	Even Match	0	0	10	1	0	10	13	1	1	0
140	0	Giants								66	66	0	83	0	0		0	0	75	0	0	1	0	3	12	0	0	0	50	75	75	2.3333333	7	-.064549722	10	10.393905	0				1		0		0
140	1	Giants	75	14	33	2.5	23dec2012 19:31:00	23dec2012 19:32:33	23dec2012 19:36:42	4	1	53	9	34	77	1	0	0	75	0	0	1	0	3	12	0	0	0	50	75	75	3	8	-.083333336	8	68.285576	-19	-21	Even Match	0	0	-19	0	1	0	-21.5	0	0	1
141	0	Redskins								16	50	16	33	16	16		0	0	75	0	0	0	1	3	8	0	0	25	25	50	50		8	-.15811388	0	30.063324	0				1		0		0
141	1	Redskins	100	27	20	4.5	23dec2012 15:59:06	23dec2012 16:00:38	23dec2012 16:03:42	56	56	0	2	0	0	11	0	0	75	0	0	0	1	3	8	0	0	25	25	50	50	2	5	0	3	14.021326	7	7	Even Match	0	0	7	1	0	7	2.5	1	0	1
141	2	Redskins	100	28	18	3	30dec2012 23:28:33	30dec2012 23:29:45	30dec2012 23:31:51	75	91	0	0	0	0	74	0	0	75	0	0	0	1	3	8	0	0	25	25	50	50	0	2	-.41602516	4	5.0417147	10	7	Even Match	1	0	10	1	0	10	7	1	0	1
141	3	Redskins	100	14	24	-3	06jan2013 19:34:15	06jan2013 19:38:23	06jan2013 19:40:30	0	0	14	8	7	22	25	0	0	75	0	0	0	1	3	8	0	0	25	25	50	50	0	1	-.30151135	4	40.910873	-10	-14	Even Match	1	0	-10	0	1	0	-7	0	1	0
142	0	Colts								0	50	0	0	0	50		0	1	50	0	0	1	0	2	4	0	7	25	50	50	75		12	-.28867513	8	32.675915	0				1		0		0
142	1	Colts	75	20	13	5	23dec2012 16:10:02	23dec2012 16:13:28	23dec2012 16:16:27	77	91	0	0	1	0	75	0	1	50	0	0	1	0	2	4	0	7	25	50	50	75		4	0	0	5.0660777	7	7	Even Match	0	0	7	1	0	7	2	1	0	1
142	3	Colts	75	9	24	-7.5	06jan2013 16:17:38	06jan2013 16:22:06	06jan2013 16:25:30	3	48	50	5	49	79	94	0	1	50	0	0	1	0	2	4	0	7	25	50	50	75	0	3	-.77459669	4	62.061787	-15	-21	Predicted Loss	1	0	-15	0	1	0	-7.5	0	1	0
143	0	Bills								0	50	0	50	0	33		0	0	30	0	0	1	0	4	12	12	12	75	75	100	75	0	0	.17677669	3	28.293415	0				1		0		0
143	1	Bills	100	10	24	-4.5	23dec2012 16:14:24	23dec2012 16:14:19	23dec2012 16:18:55	33	25	30	36	71	70	19	0	0	30	0	0	1	0	4	12	12	12	75	75	100	75	.66666669	2	.079056941	5	61.73045	-14	-14	Even Match	0	0	-14	0	1	0	-9.5	0	1	0
144	0	49ers								0	0	50	0	0	50		0	1	75	0	0	1	0	4	16	3	3	50	50	75	75		5	-.083333336	0	54.240967	0				1		0		0
144	1	49ers	100	13	42	-2.5	23dec2012 23:33:29	23dec2012 23:35:36	23dec2012 23:39:57	0	0	97	45	99	93	0	0	1	75	0	0	1	0	4	16	3	3	50	50	75	75	2.5	7	-.072168782	7	97.103416	-29	-35	Even Match	0	0	-29	0	1	0	-26.5	0	1	0
144	2	49ers	100	27	13	16.5	30dec2012 19:15:09	30dec2012 19:17:18	30dec2012 19:20:34	100	100	0	0	0	0	100	0	1	75	0	0	1	0	4	16	3	3	50	50	75	75	4	9	-.6882472	6	.70951116	14	14	Predicted Win	0	0	14	1	0	14	-2.5	0	0	1
144	4	49ers	100	45	31	3	12jan2013 23:36:34	12jan2013 23:42:54	12jan2013 23:45:35	100	100	0	0	0	0	100	0	1	75	0	0	1	0	4	16	3	3	50	50	75	75	3	5	-.2773501	5	.70951116	14	14	Even Match	1	0	14	1	0	14	11	1	0	1
144	5	49ers	100	28	24	4	20jan2013 18:03:33	20jan2013 18:03:04	20jan2013 18:05:14	100	100	0	0	0	0	100	0	1	75	0	0	1	0	4	16	3	3	50	50	75	75		7	-.83205032	0	.70951116	4	0	Even Match	1	0	4	1	0	4	0	0	0	1
144	6	49ers	100	31	34	4.5	03feb2013 22:46:25	03feb2013 22:48:34	03feb2013 22:50:38	0	0	100	0	100	100	73	0	1	75	0	0	1	0	4	16	3	3	50	50	75	75	2	5	-.51639777	10	100	-3	-7	Even Match	1	0	-3	0	1	0	-7.5	0	0	1
146	0	Cowboys								100	16	50	16	50	83		0	0	30	0	1	0	0	4	16	0	0	50	75	100	100		15	-.28867513	16	59.891083	0				1		0		0
146	1	Cowboys	50	31	34	3	23dec2012 16:38:26	23dec2012 16:42:39	23dec2012 16:46:37	9	1	62	13	86	99	3	0	0	30	0	1	0	0	4	16	0	0	50	75	100	100	5.5	13	-.23570226	13	86.714607	-3	-7	Even Match	0	0	-3	0	1	0	-6	0	0	1
146	2	Cowboys	100	18	28	-3	30dec2012 23:28:33	30dec2012 23:29:59	30dec2012 23:33:16	7	8	96	8	99	97	7	0	0	30	0	1	0	0	4	16	0	0	50	75	100	100	6	12	-.83405763	8	95.769661	-10	-14	Even Match	1	0	-10	0	1	0	-7	0	1	0
147	0	Packers								16	100	0	0	0	50		0	0	50	0	0	1	0	4	16	1	3	25	75	75	100		10	-.28867513	8	20.945457	0				1		0		0
147	1	Packers	100	55	7	10.5	23dec2012 16:12:13	23dec2012 16:13:20	23dec2012 16:16:24	90	100	0	0	0	10	85	0	0	50	0	0	1	0	4	16	1	3	25	75	75	100	4	11	-.15811388	10	4.0740204	48	42	Predicted Win	0	0	48	1	0	48	37.5	1	0	1
147	2	Packers	100	34	37	3	30dec2012 19:45:44	30dec2012 19:47:38	30dec2012 19:49:52	10	0	50	5	75	90	5	0	0	50	0	0	1	0	4	16	1	3	25	75	75	100		6	-.63245553	0	79.528809	-3	-7	Even Match	0	0	-3	0	1	0	-6	0	0	1
147	3	Packers	100	24	10	11	05jan2013 23:06:32	05jan2013 23:06:03	05jan2013 23:10:11	75	90	0	10	0	0	90	0	0	50	0	0	1	0	4	16	1	3	25	75	75	100	1	3	-.2773501	6	5.1702895	14	14	Predicted Win	1	0	14	1	0	14	3	1	0	1
147	4	Packers	100	31	45	-3	12jan2013 23:36:34	12jan2013 23:51:37	12jan2013 23:53:36	1	0	64	0	87	100	65	0	0	50	0	0	1	0	4	16	1	3	25	75	75	100	0	2	-.33333334	2	88.735168	-14	-14	Even Match	1	0	-14	0	1	0	-11	0	1	0
148	0	Giants								66	83	16	16	0	0		0	0	100	0	0	1	0	4	16	3	7	75	50	100	100	1	3	.075377837	4	11.107962	0				1		0		0
148	2	Giants	100	42	7	6.5	30dec2012 15:51:59	30dec2012 16:05:06	30dec2012 16:08:14	54	18	7	1	20	29	45	0	0	100	0	0	1	0	4	16	3	7	75	50	100	100	4	7	-.38729835	6	34.87429	35	35	Even Match	0	0	35	1	0	35	28.5	1	0	1
150	0	Vikings								16	16	33	0	0	50		0	1	75	0	1	0	0	4	12	3	3	75	50	75	50	3	9	-.083333336	4	45.505024	0				1		0		0
150	1	Vikings	100	23	6	-7.5	23dec2012 15:52:33	23dec2012 16:06:09	23dec2012 16:08:20	80	90	0	0	0	0	75	0	1	75	0	1	0	0	4	12	3	3	75	50	75	50	2	6	-.072168782	3	4.7422256	17	14	Predicted Loss	0	0	17	1	0	17	24.5	1	1	0
151	0	Bears								66	50	0	50	0	0		0	1	75	0	0	1	0	3	12	3	3	100	75	100	100	2	6	0	9	13.877526	0				1		0		0
151	1	Bears	100	28	13	7	23dec2012 19:35:22	23dec2012 19:36:44	23dec2012 19:41:20	60	80	0	0	0	0	30	0	1	75	0	0	1	0	3	12	3	3	100	75	100	100	2	7	-.064549722	6	8.7749405	15	14	Even Match	0	0	15	1	0	15	8	1	0	1
151	2	Bears	100	26	24	3	30dec2012 16:05:06	30dec2012 16:07:34	30dec2012 16:14:31	70	50	0	35	0	35	20	0	1	75	0	0	1	0	3	12	3	3	100	75	100	100	0	2	-.33333334	2	21.848795	2	0	Even Match	0	0	2	1	0	2	-1	0	0	1
152	0	Browns								0	50	0	0	0	0		0	1	30	0	1	0	0	4	16	1	1	50	50	75	50	2	5	0	6	20.873081	0				1		0		0
152	1	Browns	100	12	34	-11	23dec2012 19:13:32	23dec2012 19:27:56	23dec2012 19:32:19	0	0	0	0	0	100	0	0	1	30	0	1	0	0	4	16	1	1	50	50	75	50	2	4	0	3	54.602894	-22	-28	Predicted Loss	0	0	-22	0	1	0	-11	0	1	0
153	0	Patriots								0	50	0	0	0	0		0	0	30	1	0	0	0	4	16	3	3	0	50	75	50	0	2	.088388346	1	20.873081	0				1		0		0
153	1	Patriots	100	23	16	14	23dec2012 16:05:39	23dec2012 16:10:55	23dec2012 16:16:37	51	56	33	100	51	51	51	0	0	30	1	0	0	0	4	16	3	3	0	50	75	50	1	3	0	4	44.871693	7	7	Predicted Win	0	0	7	1	0	7	-7	0	0	1
153	2	Patriots	100	28	0	11.5	30dec2012 19:23:53	30dec2012 19:29:00	30dec2012 19:32:05	51	100	7	11	7	10	100	0	0	30	1	0	0	0	4	16	3	3	0	50	75	50	1	3	-.28867513	7	11.085895	28	28	Predicted Win	0	0	28	1	0	28	16.5	1	0	1
153	4	Patriots	100	41	28	9.5	13jan2013 19:57:43	13jan2013 19:57:35	13jan2013 20:00:36	51	75	9	70	18	18	81	0	0	30	1	0	0	0	4	16	3	3	0	50	75	50	1	4	-.38729835	6	20.534687	13	7	Predicted Win	1	0	13	1	0	13	3.5	1	0	1
154	0	Bears								50	50	33	16	16	66		0	0	75	0	0	0	1	4	16	3	3	75	75	75	75	1.5	6	-.066815309	5	42.4683	0				1		0		0
154	1	Bears	75	28	13	7	23dec2012 19:35:22	23dec2012 19:34:00	23dec2012 19:38:18	68	65	8	14	1	9	45	0	0	75	0	0	0	1	4	16	3	3	75	75	75	75	3.5	10	-.15811388	9	15.085768	15	14	Even Match	0	0	15	1	0	15	8	1	0	1
154	2	Bears	100	26	24	3	30dec2012 16:05:06	30dec2012 16:06:42	30dec2012 16:09:35	35	40	30	35	51	61	21	0	0	75	0	0	0	1	4	16	3	3	75	75	75	75		4	-.5	0	51.872238	2	0	Even Match	0	0	2	1	0	2	-1	0	0	1
155	0	Patriots								0	0	16	0	0	16		0	1	100	0	1	0	0	4	16	7	3	100	50	100	100		8	-.22613351	0	38.435226	0				1		0		0
155	1	Patriots	100	23	16	14	23dec2012 16:05:39	23dec2012 16:09:17	23dec2012 16:12:10	79	100	0	9	1	1	77	0	1	100	0	1	0	0	4	16	7	3	100	50	100	100		7	-.083333336	0	3.2124832	7	7	Predicted Win	0	0	7	1	0	7	-7	0	0	1
155	2	Patriots	100	28	0	11.5	30dec2012 19:23:53	30dec2012 19:24:47	30dec2012 19:27:26	85	97	0	12	0	0	89	0	1	100	0	1	0	0	4	16	7	3	100	50	100	100	2	5	-.41602516	4	2.734184	28	28	Predicted Win	0	0	28	1	0	28	16.5	1	0	1
155	4	Patriots	100	41	28	9.5	13jan2013 19:57:43	13jan2013 20:13:41	13jan2013 20:16:09	98	100	0	18	0	0	98	0	1	100	0	1	0	0	4	16	7	3	100	50	100	100	2	5	-.41602516	8	.77726704	13	7	Predicted Win	1	0	13	1	0	13	3.5	1	0	1
155	5	Patriots	100	13	28	7.5	20jan2013 21:48:34	20jan2013 21:52:14	20jan2013 21:54:21	0	0	97	19	8	100	18	0	1	100	0	1	0	0	4	16	7	3	100	50	100	100		3	-.35355338	0	78.459045	-15	-21	Predicted Win	1	0	-15	0	1	0	-22.5	0	0	1
157	0	Chiefs								16	16	16	0	0	50		0	1	50	0	0	0	1	3	16	3	3	50	0	75	75		6	-.083333336	0	41.615116	0				1		0		0
158	0	Bengals								0	66	0	0	0	0		0	0	50	0	1	0	0	4	16	7	3	50	100	50	100	4	10	-.22613351	5	17.633354	0				1		0		0
159	0	Redskins								50	66	0	83	0	0		0	0	50	0	0	1	0	3	16	0	0	25	0	50	25	4	9	-.15811388	10	12.000214	0				1		0		0
159	2	Redskins	100	28	18	3	30dec2012 23:28:33	30dec2012 23:30:41	30dec2012 23:33:20	90	89	1	58	1	1	86	0	0	50	0	0	1	0	3	16	0	0	25	0	50	25	3.5	8	-.375	11	4.2021303	10	7	Even Match	1	0	10	1	0	10	7	1	0	1
159	3	Redskins	100	14	24	-3	06jan2013 19:34:15	06jan2013 19:37:42	06jan2013 19:39:33	4	5	79	91	83	83	9	0	0	50	0	0	1	0	3	16	0	0	25	0	50	25	5	8	-.375	7	85.267708	-10	-14	Even Match	1	0	-10	0	1	0	-7	0	1	0
160	0	Packers								50	33	0	33	0	0		0	1	100	0	0	1	0	3	16	0	0	50	75	75	50	4.5	10	-.1875	11	19.051689	0				1		0		0
160	1	Packers	5	55	7	10.5	23dec2012 16:12:13	23dec2012 16:23:02	23dec2012 16:29:18	87	100	3	1	2	2	99	0	1	100	0	0	1	0	3	16	0	0	50	75	75	50	3.5	9	-.15811388	9	3.6161191	48	42	Predicted Win	0	0	48	1	0	48	37.5	1	0	1
160	2	Packers	75	34	37	3	30dec2012 19:45:44	30dec2012 19:52:01	30dec2012 19:56:12	22	93	0	0	0	48	19	0	1	100	0	0	1	0	3	16	0	0	50	75	75	50	1.3333334	4	-.26726124	11	21.288361	-3	-7	Even Match	0	0	-3	0	1	0	-6	0	0	1
160	4	Packers	25	31	45	-3	12jan2013 23:36:34	12jan2013 23:37:08	12jan2013 23:39:12	0	0	13	0	100	100	0	0	1	100	0	0	1	0	3	16	0	0	50	75	75	50		4	-.35355338	0	80.092834	-14	-14	Even Match	1	0	-14	0	1	0	-11	0	1	0
161	0	Lions								66	66	0	0	0	16		0	0	100	0	0	1	0	3	12	1	3	25	75	75	100	3	7	-.083333336	4	14.784243	0				1		0		0
162	0	Ravens								100	100	0	0	0	0		1	0	100	0	0	1	0	3	16	3	7	100	50	50	75	4	7	-.15811388	5	.70951116	0				1		0		0
162	1	Ravens	75	33	14	-2.5	23dec2012 19:31:00	23dec2012 19:43:08	23dec2012 19:47:00	100	100	0	8	0	0	100	1	0	100	0	0	1	0	3	16	3	7	100	50	50	75	3	7	-.083333336	8	.6503855	19	14	Even Match	0	0	19	1	0	19	21.5	1	1	0
162	3	Ravens	100	24	9	7.5	06jan2013 16:17:38	06jan2013 16:22:41	06jan2013 16:26:03	98	98	0	14	0	0	100	1	0	100	0	0	1	0	3	16	3	7	100	50	50	75	3	8	-.51639777	5	1.2117941	15	14	Predicted Win	1	0	15	1	0	15	7.5	1	0	1
163	0	Lions								0	0	0	0	16	83		0	1	50	0	0	1	0	4	16	1	3	25	50	100	100	2	6	-.083333336	3	54.192383	0				1		0		0
163	1	Lions	100	18	31	-3.5	22dec2012 23:38:15	22dec2012 23:44:39	22dec2012 23:47:29	0	10	0	0	20	50	5	0	1	50	0	0	1	0	4	16	1	3	25	50	100	100	3	9	-.083333336	8	45.278294	-13	-14	Even Match	0	0	-13	0	1	0	-9.5	0	1	0
164	0	Cowboys								16	0	0	0	0	83		0	1	100	0	1	0	0	3	12	1	1	25	50	75	75		5	0	0	48.983624	0				1		0		0
164	1	Cowboys	75	31	34	3	23dec2012 16:38:26	23dec2012 16:40:42	23dec2012 16:44:23	0	0	0	0	1	49	0	0	1	100	0	1	0	0	3	12	1	1	25	50	75	75	1.3333334	4	0	7	42.789162	-3	-7	Even Match	0	0	-3	0	1	0	-6	0	0	1
164	2	Cowboys	100	18	28	-3	30dec2012 23:28:33	30dec2012 23:31:43	30dec2012 23:34:49	16	6	43	21	29	90	36	0	1	100	0	1	0	0	3	12	1	1	25	50	75	75	1.3333334	4	-.375	11	65.634529	-10	-14	Even Match	1	0	-10	0	1	0	-7	0	1	0
165	0	Texans								16	16	50	0	0	100		0	1	50	0	0	1	0	3	12	1	3	50	25	75	50		3	.094491117	0	61.197762	0				1		0		0
166	0	Vikings								66	83	50	83	0	83		0	1	100	0	0	0	1	4	16	3	3	50	50	75	75	4	15	-.28867513	13	37.985298	0				1		0		0
166	1	Vikings	100	23	6	-7.5	23dec2012 15:52:33	23dec2012 15:56:56	23dec2012 15:59:27	94	95	1	23	1	0	61	0	1	100	0	0	0	1	4	16	3	3	50	50	75	75	4	10	-.1875	5	2.6082761	17	14	Predicted Loss	0	0	17	1	0	17	24.5	1	1	0
166	2	Vikings	100	37	34	-3	30dec2012 19:45:44	30dec2012 19:46:36	30dec2012 19:48:58	100	91	6	70	5	10	37	0	1	100	0	0	0	1	4	16	3	3	50	50	75	75		5	-.5	0	6.8737459	3	0	Even Match	0	0	3	1	0	3	6	1	1	0
166	3	Vikings	100	10	24	-11	05jan2013 23:06:32	05jan2013 23:16:38	05jan2013 23:18:23	2	3	100	1	18	99	65	0	1	100	0	0	0	1	4	16	3	3	50	50	75	75	3	5	-.2773501	5	80.485771	-14	-14	Predicted Loss	1	0	-14	0	1	0	-3	0	1	0
167	0	Bears								66	66	0	50	0	16		0	1	100	0	0	0	1	3	16	0	0	25	50	75	50	4	7	-.15811388	5	14.414706	0				1		0		0
167	1	Bears	75	28	13	7	23dec2012 19:35:22	23dec2012 19:51:02	23dec2012 19:55:05	42	67	0	14	0	0	35	0	1	100	0	0	0	1	3	16	0	0	25	50	75	50		7	-.15811388	0	13.110844	15	14	Even Match	0	0	15	1	0	15	8	1	0	1
168	0	Giants								16	16	0	0	0	83		0	1	100	0	0	0	1	3	16	1	3	100	50	100	50	1.5	5	0	5	45.743896	0				1		0		0
168	1	Giants	75	14	33	2.5	23dec2012 19:31:00	23dec2012 19:31:42	23dec2012 19:35:12	0	0	90	1	100	100	1	0	1	100	0	0	0	1	3	16	1	3	100	50	100	50	1	3	0	6	97.70443	-19	-21	Even Match	0	0	-19	0	1	0	-21.5	0	0	1
168	2	Giants	75	42	7	6.5	30dec2012 15:51:59	30dec2012 15:53:52	30dec2012 15:58:10	73	81	0	0	0	0	89	0	1	100	0	0	0	1	3	16	1	3	100	50	100	50	1	3	-.40089187	9	7.2673326	35	35	Even Match	0	0	35	1	0	35	28.5	1	0	1
170	0	Chargers								50	66	0	50	0	0		0	0	50	0	0	1	0	4	16	3	3	25	100	100	100	2.5	7	-.072168782	7	12.244107	0				1		0		0
170	1	Chargers	100	27	17	-3	23dec2012 16:18:46	23dec2012 16:16:42	23dec2012 16:20:14	0	0	0	0	0	0	0	0	0	50	0	0	1	0	4	16	3	3	25	100	100	100	3	6	-.083333336	4	30.997232	10	7	Even Match	0	0	10	1	0	10	13	1	1	0
171	0	Panthers								33	66	0	0	0	16		0	1	100	0	0	1	0	1	16	1	1	50	75	100	75	1.5	4	0	5	18.097252	0				1		0		0
171	1	Panthers	100	17	6	9	23dec2012 15:59:06	23dec2012 16:02:08	23dec2012 16:07:01	11	54	5	37	0	28	8	0	1	100	0	0	1	0	1	16	1	1	50	75	100	75	2	6	0	9	26.439034	11	7	Predicted Win	0	0	11	1	0	11	2	1	0	1
172	0	Patriots								50	33	16	0	83	66		0	1	75	0	0	1	0	2	12	0	0	0	25	50	0		9	-.28867513	8	57.22411	0				1		0		0
172	2	Patriots	5	28	0	11.5	30dec2012 19:23:53	30dec2012 19:34:54	30dec2012 19:38:43	0	0	5	7	3	3	0	0	1	75	0	0	1	0	2	12	0	0	0	25	50	0	3	5	-.2773501	5	33.473217	28	28	Predicted Win	0	0	28	1	0	28	16.5	1	0	1
172	4	Patriots	100	41	28	9.5	13jan2013 19:57:43	13jan2013 19:59:59	13jan2013 20:02:33	32	89	0	6	30	20	59	0	1	75	0	0	1	0	2	12	0	0	0	25	50	0	1	4	-.33333334	7	21.195009	13	7	Predicted Win	1	0	13	1	0	13	3.5	1	0	1
174	0	Vikings								16	50	0	16	0	0		0	1	100	0	0	1	0	3	16	3	3	50	0	75	25	0	0	.17677669	3	19.148523	0				1		0		0
175	0	Buccaneers								50	66	0	0	0	0		0	1	100	0	0	0	1	3	12	0	1	25	25	50	50	2	4	0	3	12.613643	0				1		0		0
175	1	Buccaneers	75	13	28	3	23dec2012 16:10:02	23dec2012 16:11:26	23dec2012 16:14:14	0	0	0	0	2	77	0	0	1	100	0	0	0	1	3	12	0	1	25	25	50	50	0	5	-.079056941	1	49.623898	-15	-21	Even Match	0	0	-15	0	1	0	-18	0	0	1
176	0	Patriots								50	33	0	0	16	66		0	1	30	0	0	1	0	4	16	0	0	25	75	50	100	3	7	-.083333336	4	38.477768	0				1		0		0
177	0	Bears								16	50	16	16	66	83		0	0	30	0	0	1	0	4	16	3	1	75	75	100	75	1	4	0	2	57.262413	0				1		0		0
178	0	Seahawks								50	66	0	16	0	16		0	1	100	0	0	1	0	3	16	3	3	25	50	100	75	3	5	-.083333336	4	16.272299	0				1		0		0
178	3	Seahawks	100	24	14	3	06jan2013 19:34:15	06jan2013 19:35:00	06jan2013 19:39:31	65	87	0	0	0	0	67	0	1	100	0	0	1	0	3	16	3	3	25	50	100	75	3	6	-.40089187	5	6.855587	10	7	Even Match	1	0	10	1	0	10	7	1	0	1
179	0	Panthers								83	83	0	0	0	0		0	1	100	0	1	0	0	4	16	7	7	75	25	75	100	0	3	0	1	5.8584242	0				1		0		0
179	1	Panthers	25	17	6	9	23dec2012 15:59:06	23dec2012 16:01:25	23dec2012 16:08:04	100	100	0	0	0	0	100	0	1	100	0	1	0	0	4	16	7	7	75	25	75	100	1.3333334	4	0	7	.70951116	11	7	Predicted Win	0	0	11	1	0	11	2	1	0	1
180	0	Cardinals								100	0	100	16	100	100		0	1	100	0	0	1	0	4	16	3	7	75	75	75	75		7	-.15811388	0	89.842323	0				1		0		0
181	0	Cowboys								83	100	0	66	0	0		0	0	75	0	1	0	0	4	16	1	1	100	100	100	100	3	7	-.13867505	8	1.9284239	0				1		0		0
181	1	Cowboys	100	31	34	3	23dec2012 16:38:26	23dec2012 16:47:51	23dec2012 16:50:30	4	0	90	100	93	94	6	0	0	75	0	1	0	0	4	16	1	1	100	100	100	100	3	8	-.083333336	8	93.578758	-3	-7	Even Match	0	0	-3	0	1	0	-6	0	0	1
181	2	Cowboys	100	18	28	-3	30dec2012 23:28:33	30dec2012 23:30:12	30dec2012 23:33:43	0	0	98	0	79	100	0	0	0	75	0	1	0	0	4	16	1	1	100	100	100	100	1.6666666	5	-.26726124	12	94.814148	-10	-14	Even Match	1	0	-10	0	1	0	-7	0	1	0
184	0	Packers								50	50	0	0	0	0		0	1	30	0	1	0	0	4	12	0	0	100	75	100	50	3	9	-.15811388	12	15.853372	0				1		0		0
184	1	Packers	5	55	7	10.5	23dec2012 16:12:13	23dec2012 16:15:08	23dec2012 16:19:15	100	100	0	1	0	0	100	0	1	30	0	1	0	0	4	12	0	0	100	75	100	50	3	9	-.22613351	4	.70212173	48	42	Predicted Win	0	0	48	1	0	48	37.5	1	0	1
184	2	Packers	75	34	37	3	30dec2012 19:45:44	30dec2012 19:48:04	30dec2012 19:51:31	3	3	76	50	62	99	24	0	1	30	0	1	0	0	4	12	0	0	100	75	100	50		5	-.83205032	0	84.438332	-3	-7	Even Match	0	0	-3	0	1	0	-6	0	0	1
184	3	Packers	100	24	10	11	05jan2013 23:06:32	05jan2013 23:11:26	05jan2013 23:14:27	99	99	0	17	0	0	77	0	1	30	0	1	0	0	4	12	0	0	100	75	100	50	1.5	5	-.53452247	7	.88674474	14	14	Predicted Win	1	0	14	1	0	14	3	1	0	1
184	4	Packers	100	31	45	-3	12jan2013 23:36:34	12jan2013 23:42:54	12jan2013 23:45:51	51	1	99	1	20	98	51	0	1	30	0	1	0	0	4	12	0	0	100	75	100	50	2.5	6	-.53452247	9	75.956848	-14	-14	Even Match	1	0	-14	0	1	0	-11	0	1	0
185	0	Ravens								16	83	0	0	16	16		0	1	100	0	0	1	0	4	16	3	3	50	75	75	100	4	8	-.15811388	5	19.964191	0				1		0		0
186	0	Raiders								50	50	0	0	0	0		0	1	100	0	0	1	0	4	16	7	12	75	75	100	100	2	4	0	3	15.853372	0				1		0		0
186	1	Raiders	75	6	17	-9	23dec2012 15:59:06	23dec2012 16:04:25	23dec2012 16:08:36	5	6	52	8	63	78	2	0	1	100	0	0	1	0	4	16	7	12	75	75	100	100	0	5	-.079056941	1	73.716835	-11	-14	Predicted Loss	0	0	-11	0	1	0	-2	0	1	0
188	0	Steelers								50	66	0	0	0	83		0	1	100	0	0	0	1	4	12	0	1	75	25	75	75		3	.094491117	0	32.206345	0				1		0		0
189	0	Chiefs								33	66	0	0	0	0		0	1	100	0	0	1	0	3	16	3	3	25	25	75	100		14	-.28867513	8	14.320345	0				1		0		0
189	1	Chiefs	100	13	20	-5	23dec2012 16:10:02	23dec2012 16:10:12	23dec2012 16:12:25	0	0	1	0	0	36	0	0	1	100	0	0	1	0	3	16	3	3	25	25	75	100		9	-.15811388	0	39.724087	-7	-7	Even Match	0	0	-7	0	1	0	-2	0	1	0
190	0	Patriots								66	83	66	16	66	83		0	0	100	0	0	1	0	4	16	3	3	75	50	100	75	3	6	-.083333336	4	57.001663	0				1		0		0
190	1	Patriots	75	23	16	14	23dec2012 16:05:39	23dec2012 16:07:04	23dec2012 16:09:15	78	96	11	78	15	8	86	0	0	100	0	0	1	0	4	16	3	3	75	50	100	75	3	6	-.083333336	4	10.934385	7	7	Predicted Win	0	0	7	1	0	7	-7	0	0	1
191	0	Cowboys								16	33	66	33	33	83		0	0	30	0	0	1	0	4	16	1	1	75	100	100	100	2	4	0	3	64.589828	0				1		0		0
191	1	Cowboys	100	31	34	3	23dec2012 16:38:26	23dec2012 16:39:53	23dec2012 16:44:34	0	0	80	51	100	100	0	0	0	30	0	0	1	0	4	16	1	1	75	100	100	100	2	5	0	3	95.046715	-3	-7	Even Match	0	0	-3	0	1	0	-6	0	0	1
192	0	Packers								0	0	16	33	50	100		0	0	50	0	0	0	1	4	16	3	3	75	50	50	50		3	.094491117	0	69.27774	0				1		0		0
192	1	Packers	100	55	7	10.5	23dec2012 16:12:13	23dec2012 16:11:46	23dec2012 16:15:38	40	100	0	0	0	10	98	0	0	50	0	0	0	1	4	16	3	3	75	50	50	50	3	11	-.1720618	8	9.0937309	48	42	Predicted Win	0	0	48	1	0	48	37.5	1	0	1
192	2	Packers	100	34	37	3	30dec2012 19:45:44	30dec2012 19:46:31	30dec2012 19:49:30	0	0	95	60	25	90	20	0	0	50	0	0	0	1	4	16	3	3	75	50	50	50		5	-.63245553	0	79.165421	-3	-7	Even Match	0	0	-3	0	1	0	-6	0	0	1
192	3	Packers	100	24	10	11	05jan2013 23:06:32	05jan2013 23:04:53	05jan2013 23:07:06	100	100	0	52	0	0	100	0	0	50	0	0	0	1	4	16	3	3	75	50	50	50		6	-.60302269	0	.32519275	14	14	Predicted Win	1	0	14	1	0	14	3	1	0	1
192	4	Packers	100	31	45	-3	12jan2013 23:36:34	12jan2013 23:42:57	12jan2013 23:45:34	0	0	95	0	40	90	0	0	0	50	0	0	0	1	4	16	3	3	75	50	50	50	1.5	4	-.2773501	8	82.98616	-14	-14	Even Match	1	0	-14	0	1	0	-11	0	1	0
193	0	Bears								16	50	16	16	16	83		0	1	75	0	0	1	0	4	16	0	0	100	100	100	100	2	6	-.083333336	3	46.004761	0				1		0		0
193	1	Bears	100	28	13	7	23dec2012 19:35:22	23dec2012 19:38:25	23dec2012 19:41:50	53	95	0	20	0	0	93	0	1	75	0	0	1	0	4	16	0	0	100	100	100	100	2	6	0	3	6.2926402	15	14	Even Match	0	0	15	1	0	15	8	1	0	1
193	2	Bears	100	26	24	3	30dec2012 16:05:06	30dec2012 16:10:37	30dec2012 16:14:17	20	38	0	0	0	20	35	0	1	75	0	0	1	0	4	16	0	0	100	100	100	100	.5	2	-.28867513	5	26.016127	2	0	Even Match	0	0	2	1	0	2	-1	0	0	1
194	0	Browns								50	50	33	50	0	50		0	1	50	0	0	1	0	3	12	0	0	50	25	75	75	2	5	0	3	34.837662	0				1		0		0
195	0	Bears								83	100	16	66	16	0		0	1	100	0	1	0	0	3	16	3	3	25	50	75	75	4	9	-.15811388	10	9.1919622	0				1		0		0
196	0	Packers								66	50	0	16	0	16		0	0	30	0	0	1	0	4	16	0	0	25	100	75	100	2	4	0	3	17.905718	0				1		0		0
196	1	Packers	75	55	7	10.5	23dec2012 16:12:13	23dec2012 16:12:30	23dec2012 16:16:05	90	100	0	0	0	0	60	0	0	30	0	0	1	0	4	16	0	0	25	100	75	100	3	6	-.083333336	4	1.7134533	48	42	Predicted Win	0	0	48	1	0	48	37.5	1	0	1
196	2	Packers	100	34	37	3	30dec2012 19:45:44	30dec2012 19:46:56	30dec2012 19:50:00	0	0	11	0	40	80	0	0	0	30	0	0	1	0	4	16	0	0	25	100	75	100	1	3	-.26726124	9	61.404881	-3	-7	Even Match	0	0	-3	0	1	0	-6	0	0	1
196	3	Packers	100	24	10	11	05jan2013 23:06:32	05jan2013 23:06:36	05jan2013 23:09:07	15	95	0	0	0	0	15	0	0	30	0	0	1	0	4	16	0	0	25	100	75	100	1.3333334	4	-.25819889	10	10.255435	14	14	Predicted Win	1	0	14	1	0	14	3	1	0	1
196	4	Packers	100	31	45	-3	12jan2013 23:36:34	12jan2013 23:41:34	12jan2013 23:43:27	0	0	56	0	70	95	0	0	0	30	0	0	1	0	4	16	0	0	25	100	75	100		5	-.35355338	0	81.997131	-14	-14	Even Match	1	0	-14	0	1	0	-11	0	1	0
197	0	Vikings								100	100	0	0	0	0		0	1	100	0	0	1	0	4	16	0	3	100	75	75	100		6	-.15811388	0	.70951116	0				1		0		0
197	1	Vikings	100	23	6	-7.5	23dec2012 15:52:33	23dec2012 15:55:57	23dec2012 15:59:27	100	77	10	6	1	0	100	0	1	100	0	0	1	0	4	16	0	3	100	75	75	100	2	5	0	6	7.835608	17	14	Predicted Loss	0	0	17	1	0	17	24.5	1	1	0
197	2	Vikings	100	37	34	-3	30dec2012 19:45:44	30dec2012 19:48:42	30dec2012 19:51:58	100	100	0	0	0	0	100	0	1	100	0	0	1	0	4	16	0	3	100	75	75	100		6	-.60302269	0	.70951116	3	0	Even Match	0	0	3	1	0	3	6	1	1	0
197	3	Vikings	100	10	24	-11	05jan2013 23:06:32	05jan2013 23:06:08	05jan2013 23:09:15	2	6	92	3	2	100	4	0	1	100	0	0	1	0	4	16	0	3	100	75	75	100	1	3	-.30151135	3	74.666595	-14	-14	Predicted Loss	1	0	-14	0	1	0	-3	0	1	0
198	0	Patriots								50	0	0	0	0	33		1	0	30	0	0	1	0	3	16	0	0	75	75	100	100		7	-.083333336	0	33.767391	0				1		0		0
198	1	Patriots	75	23	16	14	23dec2012 16:05:39	23dec2012 16:10:20	23dec2012 16:20:05	81	81	0	12	0	0	44	1	0	30	0	0	1	0	3	16	0	0	75	75	100	100	1.6666666	5	0	8	6.3754897	7	7	Predicted Win	0	0	7	1	0	7	-7	0	0	1
198	2	Patriots	100	28	0	11.5	30dec2012 19:23:53	30dec2012 19:32:14	30dec2012 19:34:39	100	100	0	0	0	0	100	1	0	30	0	0	1	0	3	16	0	0	75	75	100	100	2	5	-.51639777	4	.70951116	28	28	Predicted Win	0	0	28	1	0	28	16.5	1	0	1
198	4	Patriots	75	41	28	9.5	13jan2013 19:57:43	13jan2013 19:59:17	13jan2013 20:01:12	100	100	0	0	0	0	100	1	0	30	0	0	1	0	3	16	0	0	75	75	100	100	2	5	-.60302269	4	.70951116	13	7	Predicted Win	1	0	13	1	0	13	3.5	1	0	1
198	5	Patriots	100	13	28	7.5	20jan2013 21:48:34	20jan2013 21:53:24	20jan2013 21:55:23	0	0	100	0	100	100	50	1	0	30	0	0	1	0	3	16	0	0	75	75	100	100	.5	2	-.31622776	5	100	-15	-21	Predicted Win	1	0	-15	0	1	0	-22.5	0	0	1
199	0	Cowboys								50	83	0	0	0	0		0	1	75	0	1	0	0	4	16	0	0	100	100	100	100	4	10	-.15811388	10	9.1714334	0				1		0		0
199	1	Cowboys	100	31	34	3	23dec2012 16:38:26	23dec2012 16:40:10	23dec2012 16:44:27	0	0	11	0	10	56	4	0	1	75	0	1	0	0	4	16	0	0	100	100	100	100	0	12	-.2773501	9	48.984932	-3	-7	Even Match	0	0	-3	0	1	0	-6	0	0	1
200	0	Packers								50	83	0	0	0	0		0	1	100	0	0	0	1	3	16	1	3	0	50	75	75	4	10	-.15811388	10	9.1714334	0				1		0		0
200	1	Packers	100	55	7	10.5	23dec2012 16:12:13	23dec2012 16:12:21	23dec2012 16:16:38	70	90	0	0	0	0	75	0	1	100	0	0	0	1	3	16	1	3	0	50	75	75	4	7	-.15811388	5	5.7461677	48	42	Predicted Win	0	0	48	1	0	48	37.5	1	0	1
200	2	Packers	100	34	37	3	30dec2012 19:45:44	30dec2012 19:45:35	30dec2012 19:49:34	0	0	10	0	50	70	0	0	1	100	0	0	0	1	3	16	1	3	0	50	75	75		4	-.5	0	61.067028	-3	-7	Even Match	0	0	-3	0	1	0	-6	0	0	1
200	3	Packers	100	24	10	11	05jan2013 23:06:32	05jan2013 23:05:58	05jan2013 23:10:36	45	74	0	10	0	0	59	0	1	100	0	0	0	1	3	16	1	3	0	50	75	75	3	7	-.51639777	10	11.421844	14	14	Predicted Win	1	0	14	1	0	14	3	1	0	1
200	4	Packers	100	31	45	-3	12jan2013 23:36:34	12jan2013 23:37:05	12jan2013 23:41:15	0	0	30	0	20	60	0	0	1	100	0	0	0	1	3	16	1	3	0	50	75	75	2.6666667	8	-.5	16	56.528229	-14	-14	Even Match	1	0	-14	0	1	0	-11	0	1	0
203	0	Chiefs								16	33	33	66	0	50		0	1	30	0	0	1	0	3	12	1	1	50	0	50	75	2	6	-.075377837	6	41.575024	0				1		0		0
203	1	Chiefs	75	13	20	-5	23dec2012 16:10:02	23dec2012 16:08:53	23dec2012 16:14:35	28	90	24	35	25	12	29	0	1	30	0	0	1	0	3	12	1	1	50	0	50	75	2	8	-.125	6	23.657187	-7	-7	Even Match	0	0	-7	0	1	0	-2	0	1	0
204	0	Raiders								0	66	0	0	0	16		0	1	75	0	0	1	0	4	16	1	3	100	100	100	100	2	6	-.083333336	3	21.410261	0				1		0		0
204	1	Raiders	100	6	17	-9	23dec2012 15:59:06	23dec2012 16:02:32	23dec2012 16:05:34	1	1	85	1	70	100	0	0	1	75	0	0	1	0	4	16	1	3	100	100	100	100	2	7	-.064549722	6	89.502869	-11	-14	Predicted Loss	0	0	-11	0	1	0	-2	0	1	0
205	0	Bills								33	83	0	16	0	16		0	0	30	0	0	1	0	4	16	0	0	25	50	50	75	3	7	-.083333336	4	14.536789	0				1		0		0
205	1	Bills	100	10	24	-4.5	23dec2012 16:14:24	23dec2012 16:14:01	23dec2012 16:18:38	0	0	0	0	4	79	0	0	0	30	0	0	1	0	4	16	0	0	25	50	50	75	2.5	6	-.083333336	7	50.546318	-14	-14	Even Match	0	0	-14	0	1	0	-9.5	0	1	0
206	0	49ers								66	33	66	0	33	50		0	1	75	0	0	1	0	4	16	12	12	50	75	100	75	3	8	-.083333336	4	52.024147	0				1		0		0
207	0	Saints								50	66	33	33	16	50		0	1	100	0	1	0	0	2	12	3	7	50	25	50	50		14	-.28867513	0	35.326023	0				1		0		0
207	1	Saints	75	34	31	-3	23dec2012 16:38:26	23dec2012 16:41:28	23dec2012 16:48:26	82	82	0	10	0	5	81	0	1	100	0	1	0	0	2	12	3	7	50	25	50	50	4	12	-.15811388	5	7.2676768	3	0	Even Match	0	0	3	1	0	3	6	1	1	0
208	0	Texans								0	83	0	0	0	16		0	0	100	0	1	0	0	4	16	7	7	100	100	100	100		5	-.083333336	0	17.96805	0				1		0		0
208	1	Texans	100	6	23	7.5	23dec2012 15:52:33	23dec2012 15:57:00	23dec2012 16:02:07	0	18	100	47	100	100	0	0	0	100	0	1	0	0	4	16	7	7	100	100	100	100	1.5	5	0	5	96.007942	-17	-21	Predicted Win	0	0	-17	0	1	0	-24.5	0	0	1
208	2	Texans	100	16	28	6.5	30dec2012 16:00:44	30dec2012 16:03:57	30dec2012 16:09:49	0	0	100	75	100	100	0	0	0	100	0	1	0	0	4	16	7	7	100	100	100	100	.33333334	1	-.14433756	7	99.445694	-12	-14	Even Match	0	0	-12	0	1	0	-18.5	0	0	1
208	3	Texans	100	19	13	4	05jan2013 19:43:23	05jan2013 19:54:33	05jan2013 19:58:03	95	100	0	30	0	20	80	0	0	100	0	1	0	0	4	16	7	7	100	100	100	100	.66666669	2	-.13867505	8	5.7108936	6	0	Even Match	1	0	6	1	0	6	2	1	0	1
208	4	Texans	100	28	41	-9.5	13jan2013 19:57:43	13jan2013 19:58:54	13jan2013 20:02:13	0	0	100	25	100	100	0	0	0	100	0	1	0	0	4	16	7	7	100	100	100	100	.5	2	-.28867513	5	99.815231	-13	-14	Predicted Loss	1	0	-13	0	1	0	-3.5	0	1	0
210	0	Dolphins								66	83	0	0	0	50		0	1	100	0	0	1	0	4	16	3	7	0	25	50	50		8	-.22613351	0	19.367958	0				1		0		0
210	1	Dolphins	75	24	10	4.5	23dec2012 16:14:24	23dec2012 16:21:02	23dec2012 16:24:39	100	100	0	0	0	0	36	0	1	100	0	0	1	0	4	16	3	7	0	25	50	50	2	6	0	6	.70951116	14	14	Even Match	0	0	14	1	0	14	9.5	1	0	1
212	0	Giants								83	83	0	0	0	50		0	1	100	0	0	0	1	4	16	3	3	75	50	100	75	4	12	-.1875	5	17.661257	0				1		0		0
212	1	Giants	75	14	33	2.5	23dec2012 19:31:00	23dec2012 19:38:03	23dec2012 19:43:54	54	17	33	0	39	100	55	0	1	100	0	0	0	1	4	16	3	3	75	50	100	75		5	-.083333336	0	62.071362	-19	-21	Even Match	0	0	-19	0	1	0	-21.5	0	0	1
213	0	Packers								0	0	0	0	33	100		0	0	75	0	0	1	0	4	8	3	3	50	50	75	75		5	0	0	62.032944	0				1		0		0
213	1	Packers	75	55	7	10.5	23dec2012 16:12:13	23dec2012 16:25:11	23dec2012 16:30:08	100	100	0	23	0	0	100	0	0	75	0	0	1	0	4	8	3	3	50	50	75	75	2	5	0	6	.5395236	48	42	Predicted Win	0	0	48	1	0	48	37.5	1	0	1
213	4	Packers	75	31	45	-3	12jan2013 23:36:34	12jan2013 23:38:24	12jan2013 23:40:54	2	19	79	3	68	100	54	0	0	75	0	0	1	0	4	8	3	3	50	50	75	75	1.5	4	-.2773501	8	83.919785	-14	-14	Even Match	1	0	-14	0	1	0	-11	0	1	0
214	0	Patriots								83	83	0	0	0	16		0	1	50	0	0	1	0	3	12	1	1	50	25	50	50	4	7	-.15811388	5	9.6353292	0				1		0		0
214	1	Patriots	75	23	16	14	23dec2012 16:05:39	23dec2012 16:15:22	23dec2012 16:17:42	96	94	1	9	0	0	93	0	1	50	0	0	1	0	3	12	1	1	50	25	50	50	1.5	4	0	5	2.4882874	7	7	Predicted Win	0	0	7	1	0	7	-7	0	0	1
215	0	Redskins								16	33	0	16	33	50		1	1	75	0	0	1	0	4	16	0	0	50	50	75	75	3	7	-.083333336	4	41.823616	0				1		0		0
215	1	Redskins	100	27	20	4.5	23dec2012 15:59:06	23dec2012 15:58:36	23dec2012 16:04:50	40	37	0	0	0	0	23	1	1	75	0	0	1	0	4	16	0	0	50	50	75	75		6	-.083333336	0	19.489594	7	7	Even Match	0	0	7	1	0	7	2.5	1	0	1
215	2	Redskins	100	28	18	3	30dec2012 23:28:33	30dec2012 23:29:41	30dec2012 23:33:53	17	72	0	0	0	11	0	1	1	75	0	0	1	0	4	16	0	0	50	50	75	75	1	3	-.30151135	3	17.308378	10	7	Even Match	1	0	10	1	0	10	7	1	0	1
215	3	Redskins	100	14	24	-3	06jan2013 19:34:15	06jan2013 19:41:43	06jan2013 19:44:12	0	0	0	0	39	62	0	1	1	75	0	0	1	0	4	16	0	0	50	50	75	75	0	2	-.31622776	2	54.413712	-10	-14	Even Match	1	0	-10	0	1	0	-7	0	1	0
216	0	Bears								0	33	83	100	33	50		0	1	100	0	0	0	1	3	16	3	3	25	25	75	75	2	6	0	6	61.800995	0				1		0		0
216	1	Bears	75	28	13	7	23dec2012 19:35:22	23dec2012 19:43:37	23dec2012 19:48:34	42	89	10	6	84	3	37	0	1	100	0	0	0	1	3	16	3	3	25	25	75	75	2.5	6	-.083333336	7	30.62455	15	14	Even Match	0	0	15	1	0	15	8	1	0	1
218	0	Redskins								100	100	16	83	0	16		0	0	75	0	0	1	0	4	16	1	1	50	50	75	50	2	6	0	6	7.5340743	0				1		0		0
218	1	Redskins	100	27	20	4.5	23dec2012 15:59:06	23dec2012 16:01:32	23dec2012 16:05:05	95	90	4	96	2	2	98	0	0	75	0	0	1	0	4	16	1	1	50	50	75	50	3	6	-.083333336	4	4.3644929	7	7	Even Match	0	0	7	1	0	7	2.5	1	0	1
218	2	Redskins	100	28	18	3	30dec2012 23:28:33	30dec2012 23:43:16	30dec2012 23:47:14	89	93	3	45	3	0	99	0	0	75	0	0	1	0	4	16	1	1	50	50	75	50	1	3	-.30151135	6	4.2605586	10	7	Even Match	1	0	10	1	0	10	7	1	0	1
218	3	Redskins	100	14	24	-3	06jan2013 19:34:15	06jan2013 19:41:07	06jan2013 19:43:48	4	13	48	22	8	51	36	0	0	75	0	0	1	0	4	16	1	1	50	50	75	50	2	5	-.60302269	4	52.624157	-10	-14	Even Match	1	0	-10	0	1	0	-7	0	1	0
219	0	Bears								50	33	0	0	16	50		0	1	100	0	0	1	0	4	16	0	0	0	50	100	75	2	4	0	3	34.700863	0				1		0		0
219	1	Bears	75	28	13	7	23dec2012 19:35:22	23dec2012 19:35:28	23dec2012 19:44:47	34	77	12	45	29	71	43	0	1	100	0	0	1	0	4	16	0	0	0	50	100	75	1	3	.083333336	2	37.695332	15	14	Even Match	0	0	15	1	0	15	8	1	0	1
219	2	Bears	100	26	24	3	30dec2012 16:05:06	30dec2012 16:10:52	30dec2012 16:14:47	22	31	31	79	20	40	20	0	1	100	0	0	1	0	4	16	0	0	0	50	100	75	.5	2	-.28867513	5	42.966404	2	0	Even Match	0	0	2	1	0	2	-1	0	0	1
220	0	Packers								100	83	0	50	0	33		0	1	75	0	0	1	0	3	16	0	1	75	50	100	25	3	12	-.22613351	4	11.572055	0				1		0		0
220	1	Packers	75	55	7	10.5	23dec2012 16:12:13	23dec2012 16:13:37	23dec2012 16:17:15	70	90	0	8	0	0	70	0	1	75	0	0	1	0	3	16	0	1	75	50	100	25	3	6	-.083333336	4	5.6870422	48	42	Predicted Win	0	0	48	1	0	48	37.5	1	0	1
220	2	Packers	100	34	37	3	30dec2012 19:45:44	30dec2012 19:46:46	30dec2012 19:50:02	41	9	75	39	91	63	9	0	1	75	0	0	1	0	3	16	0	1	75	50	100	25	2	6	-.51639777	4	77.292328	-3	-7	Even Match	0	0	-3	0	1	0	-6	0	0	1
220	4	Packers	100	31	45	-3	12jan2013 23:36:34	12jan2013 23:39:12	12jan2013 23:43:19	9	5	79	6	100	98	3	0	1	75	0	0	1	0	3	16	0	1	75	50	100	25	1	5	-.35355338	3	92.762398	-14	-14	Even Match	1	0	-14	0	1	0	-11	0	1	0
221	0	Cardinals								0	50	0	0	0	16		0	1	100	0	0	1	0	4	16	3	7	75	100	100	100	3	7	-.083333336	8	24.649988	0				1		0		0
221	1	Cardinals	75	13	28	-7	23dec2012 19:35:22	23dec2012 19:42:09	23dec2012 19:45:55	0	0	40	0	40	63	7	0	1	100	0	0	1	0	4	16	3	7	75	100	100	100		6	-.083333336	0	64.027641	-15	-21	Even Match	0	0	-15	0	1	0	-8	0	1	0
222	0	Chiefs								0	50	0	0	0	33		0	1	100	0	0	1	0	4	16	3	3	75	50	75	75	3	7	-.083333336	4	28.662951	0				1		0		0
223	0	49ers								16	50	0	0	0	33		0	1	100	0	0	0	1	4	16	0	0	100	100	100	100	3	5	-.083333336	4	27.056644	0				1		0		0
223	2	49ers	100	27	13	16.5	30dec2012 19:15:09	30dec2012 19:20:38	30dec2012 19:26:23	40	75	0	1	1	1	30	0	1	100	0	0	0	1	4	16	0	0	100	100	100	100	.66666669	2	-.13867505	8	12.249058	14	14	Predicted Win	0	0	14	1	0	14	-2.5	0	0	1
224	0	Seahawks								50	33	0	0	0	50		0	0	50	0	0	1	0	2	8	1	1	25	25	0	0	3	10	-.15811388	4	31.098413	0				1		0		0
224	1	Seahawks	100	42	13	2.5	23dec2012 23:33:29	23dec2012 23:36:09	23dec2012 23:41:26	45	64	15	25	9	11	30	0	0	50	0	0	1	0	2	8	1	1	25	25	0	0	0	2	.094491117	1	21.391083	29	28	Even Match	0	0	29	1	0	29	26.5	1	0	1
224	3	Seahawks	100	24	14	3	06jan2013 19:34:15	06jan2013 19:34:54	06jan2013 19:42:30	82	71	6	50	13	8	74	0	0	50	0	0	1	0	2	8	1	1	25	25	0	0	1	3	-.33333334	7	14.207428	10	7	Even Match	1	0	10	1	0	10	7	1	0	1
224	4	Seahawks	100	28	30	-3	13jan2013 16:14:53	13jan2013 16:15:08	13jan2013 16:18:59	75	23	74	66	32	79	31	0	0	50	0	0	1	0	2	8	1	1	25	25	0	0	2	4	-.28867513	4	61.108673	-2	-7	Even Match	1	0	-2	0	1	0	1	1	1	0
226	0	Seahawks								83	83	0	66	16	16		0	1	75	0	0	1	0	4	16	12	12	75	50	75	50	3.5	11	-.15811388	9	12.74999	0				1		0		0
226	1	Seahawks	100	42	13	2.5	23dec2012 23:33:29	23dec2012 23:39:38	23dec2012 23:42:43	81	73	0	0	0	0	43	0	1	75	0	0	1	0	4	16	12	12	75	50	75	50	2.5	6	-.072168782	7	8.0840425	29	28	Even Match	0	0	29	1	0	29	26.5	1	0	1
226	3	Seahawks	100	24	14	3	06jan2013 19:34:15	06jan2013 19:36:13	06jan2013 19:37:56	100	100	0	0	0	0	54	0	1	75	0	0	1	0	4	16	12	12	75	50	75	50		4	-.35355338	0	.70951116	10	7	Even Match	1	0	10	1	0	10	7	1	0	1
226	4	Seahawks	100	28	30	-3	13jan2013 16:14:53	13jan2013 16:15:49	13jan2013 16:19:03	0	0	78	51	51	100	0	0	1	75	0	0	1	0	4	16	12	12	75	50	75	50	.66666669	2	-.2773501	8	83.55658	-2	-7	Even Match	1	0	-2	0	1	0	1	1	1	0
227	0	Dolphins								0	0	0	0	0	0		0	1	30	0	1	0	0	3	16	0	0	25	100	100	100		4	0	0	30.997232	0				1		0		0
227	1	Dolphins	75	24	10	4.5	23dec2012 16:14:24	23dec2012 16:16:49	23dec2012 16:19:36	0	0	0	0	0	0	0	0	1	30	0	1	0	0	3	16	0	0	25	100	100	100		10	-.28867513	8	30.997232	14	14	Even Match	0	0	14	1	0	14	9.5	1	0	1
228	0	Broncos								83	66	33	33	0	33		0	0	30	0	0	1	0	4	16	1	1	100	50	100	75	2	7	-.13867505	3	24.397604	0				1		0		0
228	1	Broncos	75	34	12	11	23dec2012 19:13:32	23dec2012 19:15:38	23dec2012 19:19:26	70	81	0	0	0	0	29	0	0	30	0	0	1	0	4	16	1	1	100	50	100	75	1.5	5	0	5	7.5685148	22	21	Predicted Win	0	0	22	1	0	22	11	1	0	1
228	2	Broncos	75	38	3	17	30dec2012 19:15:09	30dec2012 19:20:58	30dec2012 19:24:08	100	100	0	10	0	0	25	0	0	30	0	0	1	0	4	16	1	1	100	50	100	75	.33333334	1	-.14433756	7	.63560325	35	35	Predicted Win	0	0	35	1	0	35	18	1	0	1
228	4	Broncos	100	35	38	9	12jan2013 20:48:21	12jan2013 20:49:26	12jan2013 20:53:34	0	0	75	10	25	100	0	0	0	30	0	0	1	0	4	16	1	1	100	50	100	75	.5	2	-.2773501	5	77.31916	-3	-7	Predicted Win	1	0	-3	0	1	0	-12	0	0	1
229	0	Patriots								50	66	16	16	33	66		0	1	50	0	0	0	1	4	16	0	3	75	50	100	50	2	6	0	6	39.166267	0				1		0		0
229	1	Patriots	75	23	16	14	23dec2012 16:05:39	23dec2012 16:08:16	23dec2012 16:23:56	12	32	52	45	28	34	5	0	1	50	0	0	0	1	4	16	0	3	75	50	100	50	2	4	0	3	49.209209	7	7	Predicted Win	0	0	7	1	0	7	-7	0	0	1
229	2	Patriots	75	28	0	11.5	30dec2012 19:23:53	30dec2012 19:24:51	30dec2012 19:28:16	38	49	2	39	2	29	65	0	1	50	0	0	0	1	4	16	0	3	75	50	100	50	2	5	-.51639777	4	24.725931	28	28	Predicted Win	0	0	28	1	0	28	16.5	1	0	1
229	4	Patriots	100	41	28	9.5	13jan2013 19:57:43	13jan2013 19:58:10	13jan2013 20:01:55	75	75	12	50	7	11	51	0	1	50	0	0	0	1	4	16	0	3	75	50	100	50	.33333334	1	-.14433756	7	14.830416	13	7	Predicted Win	1	0	13	1	0	13	3.5	1	0	1
229	5	Patriots	100	13	28	7.5	20jan2013 21:48:34	20jan2013 21:50:49	20jan2013 21:55:12	31	15	76	9	57	81	39	0	1	50	0	0	0	1	4	16	0	3	75	50	100	50	.5	2	-.33333334	6	74.125732	-15	-21	Predicted Win	1	0	-15	0	1	0	-22.5	0	0	1
230	0	Steelers								66	66	16	0	0	0		0	1	75	0	0	1	0	4	16	1	3	75	75	75	50	1.5	5	0	5	14.668424	0				1		0		0
230	1	Steelers	100	10	13	3	23dec2012 16:18:46	23dec2012 16:20:54	23dec2012 16:23:16	0	0	81	0	19	93	72	0	1	75	0	0	1	0	4	16	1	3	75	75	75	50	2	6	0	9	75.762665	-3	-7	Even Match	0	0	-3	0	1	0	-6	0	0	1
231	0	Packers								50	83	0	0	0	33		0	1	75	0	1	0	0	4	16	0	3	100	100	100	100	3	7	-.083333336	4	16.961302	0				1		0		0
231	1	Packers	75	55	7	10.5	23dec2012 16:12:13	23dec2012 16:13:24	23dec2012 16:16:55	100	100	0	0	0	0	100	0	1	75	0	1	0	0	4	16	0	3	100	100	100	100	2	5	0	6	.70951116	48	42	Predicted Win	0	0	48	1	0	48	37.5	1	0	1
231	2	Packers	100	34	37	3	30dec2012 19:45:44	30dec2012 19:45:53	30dec2012 19:49:00	0	0	47	0	49	22	20	0	1	75	0	1	0	0	4	16	0	3	100	100	100	100		4	-.35355338	0	57.977421	-3	-7	Even Match	0	0	-3	0	1	0	-6	0	0	1
231	3	Packers	100	24	10	11	05jan2013 23:06:32	05jan2013 23:07:47	05jan2013 23:10:02	100	100	0	3	0	0	100	0	1	75	0	1	0	0	4	16	0	3	100	100	100	100	1.5	4	-.53452247	9	.68733948	14	14	Predicted Win	1	0	14	1	0	14	3	1	0	1
231	4	Packers	100	31	45	-3	12jan2013 23:36:34	12jan2013 23:42:12	12jan2013 23:45:49	11	13	13	4	43	92	9	0	1	75	0	1	0	0	4	16	0	3	100	100	100	100	1	3	-.30151135	3	61.604477	-14	-14	Even Match	1	0	-14	0	1	0	-11	0	1	0
232	0	Giants								66	66	0	33	0	0		0	1	100	0	0	1	0	3	16	3	3	50	25	75	75	3	9	-.083333336	12	10.763442	0				1		0		0
232	1	Giants	75	14	33	2.5	23dec2012 19:31:00	23dec2012 19:33:25	23dec2012 19:37:12	39	35	47	0	48	100	0	0	1	100	0	0	1	0	3	16	3	3	50	25	75	75	3	7	-.083333336	4	65.162407	-19	-21	Even Match	0	0	-19	0	1	0	-21.5	0	0	1
232	2	Giants	75	42	7	6.5	30dec2012 15:51:59	30dec2012 15:54:02	30dec2012 15:57:30	85	50	2	81	14	14	52	0	1	100	0	0	1	0	3	16	3	3	50	25	75	75	1	3	-.2773501	6	18.655497	35	35	Even Match	0	0	35	1	0	35	28.5	1	0	1
233	0	Redskins								66	66	16	33	0	50		0	0	50	0	1	0	0	3	16	3	3	50	25	50	75	.5	2	.088388346	3	26.227362	0				1		0		0
235	0	Packers								16	0	0	33	0	0		0	1	30	0	0	1	0	4	16	1	3	25	75	0	50	3	9	-.13363062	4	29.14703	0				1		0		0
235	1	Packers	100	55	7	10.5	23dec2012 16:12:13	23dec2012 16:13:30	23dec2012 16:17:43	85	82	7	4	1	8	93	0	1	30	0	0	1	0	4	16	1	3	25	75	0	50	3	7	-.083333336	4	9.5458879	48	42	Predicted Win	0	0	48	1	0	48	37.5	1	0	1
235	2	Packers	100	34	37	3	30dec2012 19:45:44	30dec2012 19:46:10	30dec2012 19:50:12	77	0	61	1	77	97	26	0	1	30	0	0	1	0	4	16	1	3	25	75	0	50		4	-.5	0	77.45166	-3	-7	Even Match	0	0	-3	0	1	0	-6	0	0	1
235	3	Packers	100	24	10	11	05jan2013 23:06:32	05jan2013 23:06:52	05jan2013 23:09:16	100	100	1	1	0	2	100	0	1	30	0	0	1	0	4	16	1	3	25	75	0	50		5	-.63245553	0	1.4030515	14	14	Predicted Win	1	0	14	1	0	14	3	1	0	1
235	4	Packers	5	31	45	-3	12jan2013 23:36:34	12jan2013 23:54:15	12jan2013 23:56:20	100	39	12	45	81	39	81	0	1	30	0	0	1	0	4	16	1	3	25	75	0	50	0	1	-.16666667	4	42.917809	-14	-14	Even Match	1	0	-14	0	1	0	-11	0	1	0
236	0	Redskins								83	83	16	66	33	33		0	1	100	0	0	0	1	3	16	3	3	75	75	75	75	2	5	0	6	24.251642	0				1		0		0
236	1	Redskins	75	27	20	4.5	23dec2012 15:59:06	23dec2012 16:00:01	23dec2012 16:03:23	82	85	0	46	0	0	89	0	1	100	0	0	0	1	3	16	3	3	75	75	75	75	2	5	0	3	5.2138782	7	7	Even Match	0	0	7	1	0	7	2.5	1	0	1
236	2	Redskins	100	28	18	3	30dec2012 23:28:33	30dec2012 23:32:28	30dec2012 23:35:16	99	99	0	7	0	0	99	0	1	100	0	0	0	1	3	16	3	3	75	75	75	75	2	4	-.5	4	.96065265	10	7	Even Match	1	0	10	1	0	10	7	1	0	1
236	3	Redskins	100	14	24	-3	06jan2013 19:34:15	06jan2013 19:39:32	06jan2013 19:47:28	78	43	30	76	86	48	100	0	1	100	0	0	0	1	3	16	3	3	75	75	75	75	2	4	-.28867513	4	51.456436	-10	-14	Even Match	1	0	-10	0	1	0	-7	0	1	0
237	0	Giants								33	66	0	0	0	0		0	1	75	0	0	1	0	4	16	0	1	50	75	75	50	2	6	-.083333336	3	14.320345	0				1		0		0
237	1	Giants	75	14	33	2.5	23dec2012 19:31:00	23dec2012 19:33:53	23dec2012 19:40:14	0	0	20	0	100	100	0	0	1	75	0	0	1	0	4	16	0	1	50	75	75	50	1	3	.083333336	2	81.694557	-19	-21	Even Match	0	0	-19	0	1	0	-21.5	0	0	1
238	0	Bengals								33	0	0	0	0	66		0	1	100	0	0	1	0	4	16	7	7	50	75	100	100		5	-.083333336	0	43.263962	0				1		0		0
239	0	Browns								83	66	16	50	16	50		0	0	30	0	0	1	0	4	12	12	12	100	100	100	100	4	10	-.15811388	10	27.997467	0				1		0		0
239	1	Browns	75	12	34	-11	23dec2012 19:13:32	23dec2012 19:16:21	23dec2012 19:19:17	0	0	100	0	100	100	0	0	0	30	0	0	1	0	4	12	12	12	100	100	100	100		6	-.083333336	0	100	-22	-28	Predicted Loss	0	0	-22	0	1	0	-11	0	1	0
240	0	Bears								0	0	33	0	0	50		0	1	75	0	1	0	0	4	8	0	3	75	50	50	50		6	-.083333336	0	50.351059	0				1		0		0
240	1	Bears	75	28	13	7	23dec2012 19:35:22	23dec2012 19:35:22	23dec2012 19:40:40	70	90	0	0	0	0	30	0	1	75	0	1	0	0	4	8	0	3	75	50	50	50	2	6	0	6	5.7461677	15	14	Even Match	0	0	15	1	0	15	8	1	0	1
240	2	Bears	50	26	24	3	30dec2012 16:05:06	30dec2012 16:12:36	30dec2012 16:15:55	90	100	0	0	0	10	80	0	1	75	0	1	0	0	4	8	0	3	75	50	50	50	1	3	-.26726124	9	4.0740204	2	0	Even Match	0	0	2	1	0	2	-1	0	0	1
241	0	Panthers								100	100	0	0	0	100		0	1	30	0	0	1	0	3	16	0	0	50	75	75	75	4	10	-.22613351	5	24.315176	0				1		0		0
241	1	Panthers	75	17	6	9	23dec2012 15:59:06	23dec2012 16:01:38	23dec2012 16:08:41	20	75	0	0	0	0	60	0	1	30	0	0	1	0	3	16	0	0	50	75	75	75		8	-.15811388	0	13.803123	11	7	Predicted Win	0	0	11	1	0	11	2	1	0	1
243	0	Titans								0	33	0	0	0	50		0	1	100	0	0	1	0	4	16	0	0	25	25	100	50	2	5	0	3	36.118126	0				1		0		0
243	1	Titans	25	7	55	-10.5	23dec2012 16:12:13	23dec2012 16:13:44	23dec2012 16:18:03	0	0	0	0	27	92	0	0	1	100	0	0	1	0	4	16	0	0	25	25	100	50	2	5	0	3	58.793575	-48	-49	Predicted Loss	0	0	-48	0	1	0	-37.5	0	1	0
245	0	Seahawks								16	0	16	0	0	16		0	0	50	0	1	0	0	4	16	3	3	75	75	75	75		4	0	0	36.828918	0				1		0		0
245	1	Seahawks	75	42	13	2.5	23dec2012 23:33:29	23dec2012 23:36:53	23dec2012 23:39:40	85	7	0	25	0	0	76	0	0	50	0	1	0	0	4	16	3	3	75	75	75	75	1	3	.075377837	6	20.861574	29	28	Even Match	0	0	29	1	0	29	26.5	1	0	1
245	3	Seahawks	100	24	14	3	06jan2013 19:34:15	06jan2013 19:34:23	06jan2013 19:37:26	100	100	0	31	0	0	100	0	0	50	0	1	0	0	4	16	3	3	75	75	75	75	.5	2	-.30151135	6	.480398	10	7	Even Match	1	0	10	1	0	10	7	1	0	1
245	4	Seahawks	75	28	30	-3	13jan2013 16:14:53	13jan2013 16:15:47	13jan2013 16:19:25	0	0	100	100	100	100	54	0	0	50	0	1	0	0	4	16	3	3	75	75	75	75	1.6666666	5	-.51639777	13	99.260925	-2	-7	Even Match	1	0	-2	0	1	0	1	1	1	0
248	0	Cowboys								50	100	0	0	0	0		0	1	50	0	1	0	0	3	16	0	0	50	50	75	75	3	8	-.083333336	8	5.7292218	0				1		0		0
248	1	Cowboys	75	31	34	3	23dec2012 16:38:26	23dec2012 16:47:22	23dec2012 16:50:43	0	1	32	0	0	48	32	0	1	50	0	1	0	0	3	16	0	0	50	50	75	75		3	.094491117	0	49.447643	-3	-7	Even Match	0	0	-3	0	1	0	-6	0	0	1
249	0	Texans								50	50	0	0	0	0		0	0	100	0	0	0	1	3	12	0	0	50	25	75	75	2	6	0	3	15.853372	0				1		0		0
249	1	Texans	75	6	23	7.5	23dec2012 15:52:33	23dec2012 15:55:56	23dec2012 16:00:32	1	1	11	2	22	35	1	0	0	100	0	0	0	1	3	12	0	0	50	25	75	75	2	5	0	3	46.411919	-17	-21	Predicted Win	0	0	-17	0	1	0	-24.5	0	0	1
249	2	Texans	25	16	28	6.5	30dec2012 16:00:44	30dec2012 16:02:41	30dec2012 16:12:19	2	2	18	1	23	59	2	0	0	100	0	0	0	1	3	12	0	0	50	25	75	75	.33333334	1	-.14433756	7	53.608673	-12	-14	Even Match	0	0	-12	0	1	0	-18.5	0	0	1
249	4	Texans	75	28	41	-9.5	13jan2013 19:57:43	13jan2013 20:01:55	13jan2013 20:05:37	1	4	14	2	15	31	1	0	0	100	0	0	0	1	3	12	0	0	50	25	75	75	.33333334	1	-.14433756	7	43.970627	-13	-14	Predicted Loss	1	0	-13	0	1	0	-3.5	0	1	0
250	0	Redskins								66	66	0	0	0	50		0	1	100	0	0	1	0	4	16	3	3	100	100	100	100	4	12	-.24253562	5	22.810169	0				1		0		0
251	0	Packers								0	33	0	0	0	50		0	1	75	0	1	0	0	4	16	3	3	25	50	75	75	2	6	-.072168782	3	36.118126	0				1		0		0
251	1	Packers	100	55	7	10.5	23dec2012 16:12:13	23dec2012 16:15:20	23dec2012 16:19:27	85	100	1	1	1	1	50	0	1	75	0	1	0	0	4	16	3	3	25	50	75	75	2	5	0	6	2.8980615	48	42	Predicted Win	0	0	48	1	0	48	37.5	1	0	1
251	2	Packers	100	34	37	3	30dec2012 19:45:44	30dec2012 19:46:18	30dec2012 19:49:00	1	1	1	1	16	85	1	0	1	75	0	1	0	0	4	16	3	3	25	50	75	75	1	4	-.41602516	4	54.583046	-3	-7	Even Match	0	0	-3	0	1	0	-6	0	0	1
251	3	Packers	100	24	10	11	05jan2013 23:06:32	05jan2013 23:08:47	05jan2013 23:11:44	1	53	1	1	18	1	52	0	1	75	0	1	0	0	4	16	3	3	25	50	75	75	0	2	-.31622776	2	24.675478	14	14	Predicted Win	1	0	14	1	0	14	3	1	0	1
252	0	Bears								0	16	16	50	0	0		0	1	100	0	0	1	0	4	16	3	3	25	100	100	100	3	7	-.083333336	8	31.049055	0				1		0		0
252	1	Bears	75	28	13	7	23dec2012 19:35:22	23dec2012 19:35:25	23dec2012 19:38:22	40	99	0	0	0	0	40	0	1	100	0	0	1	0	4	16	3	3	25	100	100	100	3	9	-.13867505	8	6.935647	15	14	Even Match	0	0	15	1	0	15	8	1	0	1
252	2	Bears	100	26	24	3	30dec2012 16:05:06	30dec2012 16:07:29	30dec2012 16:09:35	88	75	0	51	0	0	65	0	1	100	0	0	1	0	4	16	3	3	25	100	100	100		3	-.35355338	0	6.5993896	2	0	Even Match	0	0	2	1	0	2	-1	0	0	1
253	0	Dolphins								0	0	0	0	0	0		0	1	100	0	0	0	1	3	16	3	12	50	50	75	75	5	11	-.24253562	12	30.997232	0				1		0		0
253	1	Dolphins	25	24	10	4.5	23dec2012 16:14:24	23dec2012 16:21:40	23dec2012 16:24:47	99	99	0	8	0	13	93	0	1	100	0	0	0	1	3	16	3	12	50	50	75	75		8	-.15811388	0	4.0219994	14	14	Even Match	0	0	14	1	0	14	9.5	1	0	1
254	0	Steelers								16	50	0	0	0	66		0	1	100	0	0	1	0	3	16	0	0	50	50	50	50	2	6	-.15811388	6	34.846512	0				1		0		0
254	1	Steelers	75	10	13	3	23dec2012 16:18:46	23dec2012 16:33:36	23dec2012 16:37:51	0	0	10	0	0	100	25	0	1	100	0	0	1	0	3	16	0	0	50	50	50	50	6	9	-.28867513	7	56.891075	-3	-7	Even Match	0	0	-3	0	1	0	-6	0	0	1
255	0	Steelers								50	50	0	100	0	0		0	1	50	1	0	0	0	3	16	0	0	50	25	75	75	3	8	-.13867505	8	15.114298	0				1		0		0
255	1	Steelers	100	10	13	3	23dec2012 16:18:46	23dec2012 16:17:00	23dec2012 16:21:12	7	59	25	37	100	100	63	0	1	50	1	0	0	0	3	16	0	0	50	25	75	75	3.5	9	-.13363062	9	69.915932	-3	-7	Even Match	0	0	-3	0	1	0	-6	0	0	1
256	0	Ravens								66	66	0	66	0	100		0	1	100	0	0	1	0	3	16	0	0	50	25	75	50		5	0	0	34.12521	0				1		0		0
256	1	Ravens	75	33	14	-2.5	23dec2012 19:31:00	23dec2012 19:31:19	23dec2012 19:34:54	87	92	0	12	2	0	97	0	1	100	0	0	1	0	3	16	0	0	50	25	75	50	2.5	6	-.072168782	7	3.9961171	19	14	Even Match	0	0	19	1	0	19	21.5	1	1	0
256	3	Ravens	100	24	9	7.5	06jan2013 16:17:38	06jan2013 16:19:18	06jan2013 16:22:50	77	92	0	28	1	3	84	0	1	100	0	0	1	0	3	16	0	0	50	25	75	50	1	3	-.2773501	6	5.3648243	15	14	Predicted Win	1	0	15	1	0	15	7.5	1	0	1
256	4	Ravens	100	38	35	-9	12jan2013 20:48:21	12jan2013 20:48:40	12jan2013 20:50:56	96	45	0	82	79	94	90	0	1	100	0	0	1	0	3	16	0	0	50	25	75	50		4	-.35355338	0	51.618027	3	0	Predicted Loss	1	0	3	1	0	3	12	1	1	0
256	5	Ravens	100	28	13	-7.5	20jan2013 21:48:34	20jan2013 21:51:21	20jan2013 21:53:44	100	100	1	53	2	3	100	0	1	100	0	0	1	0	3	16	0	0	50	25	75	50	1	3	-.26726124	6	1.7050956	15	14	Predicted Loss	1	0	15	1	0	15	22.5	1	1	0
257	0	Lions								100	50	16	66	16	83		0	0	30	0	0	1	0	4	16	3	7	75	50	100	100		17	-.28867513	8	37.20211	0				1		0		0
257	1	Lions	100	18	31	-3.5	22dec2012 23:38:15	22dec2012 23:39:17	22dec2012 23:42:26	46	16	50	46	25	85	30	0	0	30	0	0	1	0	4	16	3	7	75	50	100	100	3.5	8	-.13363062	9	59.933937	-13	-14	Even Match	0	0	-13	0	1	0	-9.5	0	1	0
258	0	Texans								0	0	0	0	100	50		0	0	50	0	0	1	0	3	16	0	0	50	25	75	50		3	.094491117	0	65.315369	0				1		0		0
259	0	Broncos								0	66	16	0	0	100		0	1	50	0	0	0	1	4	16	3	3	50	25	50	25	2	4	0	3	44.900108	0				1		0		0
259	1	Broncos	100	34	12	11	23dec2012 19:13:32	23dec2012 19:15:26	23dec2012 19:19:38	33	100	0	0	0	0	81	0	1	50	0	0	0	1	4	16	3	3	50	25	50	25	3	8	-.083333336	4	7.4359236	22	21	Predicted Win	0	0	22	1	0	22	11	1	0	1
259	2	Broncos	100	38	3	17	30dec2012 19:15:09	30dec2012 19:17:09	30dec2012 19:20:55	88	100	0	0	0	0	100	0	1	50	0	0	0	1	4	16	3	3	50	25	50	25	2	5	-.60302269	6	1.9142427	35	35	Predicted Win	0	0	35	1	0	35	18	1	0	1
259	4	Broncos	100	35	38	9	12jan2013 20:48:21	12jan2013 20:55:07	12jan2013 20:58:44	0	0	100	0	0	100	0	0	1	50	0	0	0	1	4	16	3	3	50	25	50	25	4	6	-.26726124	6	77.484695	-3	-7	Predicted Win	1	0	-3	0	1	0	-12	0	0	1
260	0	Redskins								100	100	0	0	0	0		0	1	100	0	0	0	1	3	12	1	3	75	25	75	75		7	-.15811388	0	.70951116	0				1		0		0
260	1	Redskins	100	27	20	4.5	23dec2012 15:59:06	23dec2012 16:00:47	23dec2012 16:04:52	100	98	0	96	0	0	1	0	1	100	0	0	0	1	3	12	1	3	75	25	75	75	5	10	-.22613351	6	.40496606	7	7	Even Match	0	0	7	1	0	7	2.5	1	0	1
260	2	Redskins	100	28	18	3	30dec2012 23:28:33	30dec2012 23:30:49	30dec2012 23:33:15	99	100	0	0	0	0	95	0	1	100	0	0	0	1	3	12	1	3	75	25	75	75	4	6	-.26726124	6	.80990416	10	7	Even Match	1	0	10	1	0	10	7	1	0	1
260	3	Redskins	100	14	24	-3	06jan2013 19:34:15	06jan2013 19:37:28	06jan2013 19:39:29	4	0	100	0	21	100	70	0	1	100	0	0	0	1	3	12	1	3	75	25	75	75		6	-.5	0	81.811333	-10	-14	Even Match	1	0	-10	0	1	0	-7	0	1	0
261	0	49ers								50	100	0	0	0	33		0	0	75	0	0	0	1	4	16	3	7	50	75	75	75		7	-.083333336	0	13.519092	0				1		0		0
261	1	49ers	100	13	42	-2.5	23dec2012 23:33:29	23dec2012 23:34:28	23dec2012 23:37:00	0	0	100	0	24	76	0	0	0	75	0	0	0	1	4	16	3	7	50	75	75	75	3	9	-.083333336	8	77.223015	-29	-35	Even Match	0	0	-29	0	1	0	-26.5	0	1	0
262	0	Giants								50	16	83	0	50	100		0	0	100	0	0	1	0	4	16	3	3	75	75	75	75	3	5	-.083333336	4	76.593002	0				1		0		0
263	0	Packers								66	66	0	16	0	33		0	1	100	0	0	1	0	4	16	1	1	50	0	50	25	4.5	11	-.22613351	11	18.678953	0				1		0		0
263	1	Packers	100	55	7	10.5	23dec2012 16:12:13	23dec2012 16:13:04	23dec2012 16:18:04	85	85	0	0	0	0	75	0	1	100	0	0	1	0	4	16	1	1	50	0	50	25	5	14	-.23570226	6	5.2526689	48	42	Predicted Win	0	0	48	1	0	48	37.5	1	0	1
263	2	Packers	100	34	37	3	30dec2012 19:45:44	30dec2012 19:46:11	30dec2012 19:49:47	0	0	25	4	12	90	0	0	1	100	0	0	1	0	4	16	1	1	50	0	50	25		4	-.60302269	0	60.635052	-3	-7	Even Match	0	0	-3	0	1	0	-6	0	0	1
263	3	Packers	100	24	10	11	05jan2013 23:06:32	05jan2013 23:06:23	05jan2013 23:10:28	85	90	0	6	0	0	80	0	1	100	0	0	1	0	4	16	1	1	50	0	50	25	2	5	-.2773501	8	4.1959105	14	14	Predicted Win	1	0	14	1	0	14	3	1	0	1
263	4	Packers	100	31	45	-3	12jan2013 23:36:34	12jan2013 23:43:22	12jan2013 23:46:49	0	0	25	0	30	90	0	0	1	100	0	0	1	0	4	16	1	1	50	0	50	25	2	6	-.35355338	9	64.717369	-14	-14	Even Match	1	0	-14	0	1	0	-11	0	1	0
264	0	Buccaneers								0	0	83	66	16	100		0	1	100	0	0	1	0	3	16	3	3	50	25	75	50	6	13	-.28867513	7	76.70945	0				1		0		0
264	1	Buccaneers	75	13	28	3	23dec2012 16:10:02	23dec2012 16:10:45	23dec2012 16:14:04	3	1	48	25	37	73	2	0	1	100	0	0	1	0	3	16	3	3	50	25	75	50	4	9	-.15811388	5	66.854858	-15	-21	Even Match	0	0	-15	0	1	0	-18	0	0	1
265	0	Bears								50	16	0	50	0	66		1	1	100	0	0	1	0	2	8	0	0	0	25	50	25	2	6	0	3	37.947994	0				1		0		0
268	0	49ers								0	0	0	0	0	16		0	1	100	0	0	1	0	3	12	1	3	50	75	50	25	4	9	-.15811388	5	34.774139	0				1		0		0
268	1	49ers	100	13	42	-2.5	23dec2012 23:33:29	23dec2012 23:35:14	23dec2012 23:39:12	0	0	50	75	25	100	0	0	1	100	0	0	1	0	3	12	1	3	50	75	50	25	4	9	-.15811388	10	71.118317	-29	-35	Even Match	0	0	-29	0	1	0	-26.5	0	1	0
268	2	49ers	75	27	13	16.5	30dec2012 19:15:09	30dec2012 19:23:59	30dec2012 19:27:03	0	0	0	0	50	50	0	0	1	100	0	0	1	0	3	12	1	3	50	75	50	25		4	-.60302269	0	54.057716	14	14	Predicted Win	0	0	14	1	0	14	-2.5	0	0	1
268	4	49ers	100	45	31	3	12jan2013 23:36:34	12jan2013 23:37:09	12jan2013 23:39:52	10	75	0	0	25	0	50	0	1	100	0	0	1	0	3	12	1	3	50	75	50	25	2	5	-.51639777	4	20.435892	14	14	Even Match	1	0	14	1	0	14	11	1	0	1
268	6	49ers	100	31	34	4.5	03feb2013 22:46:25	03feb2013 22:47:55	03feb2013 22:49:42	0	0	25	0	50	90	0	0	1	100	0	0	1	0	3	12	1	3	50	75	50	25	.5	2	-.2773501	5	69.220428	-3	-7	Even Match	1	0	-3	0	1	0	-7.5	0	0	1
269	0	Redskins								66	83	0	66	0	16		0	0	30	0	0	0	1	4	16	3	3	100	75	100	75	2	5	0	3	10.854243	0				1		0		0
269	1	Redskins	100	27	20	4.5	23dec2012 15:59:06	23dec2012 16:00:27	23dec2012 16:05:17	100	100	0	53	0	0	100	0	0	30	0	0	0	1	4	16	3	3	100	75	100	75	1.3333334	4	0	7	.31780335	7	7	Even Match	0	0	7	1	0	7	2.5	1	0	1
269	2	Redskins	100	28	18	3	30dec2012 23:28:33	30dec2012 23:36:01	30dec2012 23:39:30	100	100	0	9	0	0	100	0	0	30	0	0	0	1	4	16	3	3	100	75	100	75	2	4	-.28867513	4	.64299613	10	7	Even Match	1	0	10	1	0	10	7	1	0	1
269	3	Redskins	100	14	24	-3	06jan2013 19:34:15	06jan2013 19:37:57	06jan2013 19:40:00	0	0	100	50	93	100	44	0	0	30	0	0	0	1	4	16	3	3	100	75	100	75	.5	2	-.33333334	6	98.054398	-10	-14	Even Match	1	0	-10	0	1	0	-7	0	1	0
270	0	Falcons								33	50	33	16	33	66		0	1	50	0	1	0	0	4	12	0	0	100	75	100	75		5	-.083333336	0	48.002605	0				1		0		0
270	1	Falcons	100	31	18	3.5	22dec2012 23:38:15	22dec2012 23:39:37	22dec2012 23:42:30	100	100	0	4	0	0	100	0	1	50	0	1	0	0	4	12	0	0	100	75	100	75	4	12	-.19364917	10	.67995006	13	7	Even Match	0	0	13	1	0	13	9.5	1	0	1
270	4	Falcons	100	30	28	3	13jan2013 16:14:53	13jan2013 16:16:40	13jan2013 16:20:19	100	100	0	96	0	0	100	0	1	50	0	1	0	0	4	12	0	0	100	75	100	75		9	-.34668761	9	0	2	0	Even Match	1	0	2	1	0	2	-1	0	0	1
270	5	Falcons	100	24	28	-4	20jan2013 18:03:33	20jan2013 18:09:14	20jan2013 18:11:07	0	0	100	0	100	100	6	0	1	50	0	1	0	0	4	12	0	0	100	75	100	75		5	-.60302269	0	100	-4	-7	Even Match	1	0	-4	0	1	0	0	0	1	0
271	0	Packers								50	33	0	0	33	50		0	0	75	0	1	0	0	4	16	3	3	50	75	75	75	2	5	0	3	38.528465	0				1		0		0
271	3	Packers	100	24	10	11	05jan2013 23:06:32	05jan2013 23:16:11	05jan2013 23:20:49	100	100	2	46	1	1	100	0	0	75	0	1	0	0	4	16	3	3	50	75	75	75	2	4	-.28867513	4	1.2883831	14	14	Predicted Win	1	0	14	1	0	14	3	1	0	1
271	4	Packers	100	31	45	-3	12jan2013 23:36:34	12jan2013 23:42:59	12jan2013 23:47:17	20	19	100	11	100	100	12	0	0	75	0	1	0	0	4	16	3	3	50	75	75	75		3	-.35355338	0	94.063637	-14	-14	Even Match	1	0	-14	0	1	0	-11	0	1	0
272	0	Eagles								66	100	16	0	0	66		0	1	100	0	1	0	0	4	16	3	7	75	50	100	75	2	4	0	3	23.363741	0				1		0		0
272	1	Eagles	75	20	27	-4.5	23dec2012 15:59:06	23dec2012 16:00:00	23dec2012 16:02:40	63	1	80	48	71	100	1	0	1	100	0	1	0	0	4	16	3	7	75	50	100	75		6	-.15811388	0	82.012131	-7	-7	Even Match	0	0	-7	0	1	0	-2.5	0	1	0
273	0	Bears								66	83	33	50	33	16		0	1	100	0	0	1	0	2	4	0	0	0	75	75	75	.5	7	-.2773501	3	25.953539	0				1		0		0
273	1	Bears	75	28	13	7	23dec2012 19:35:22	23dec2012 19:35:03	23dec2012 19:46:33	35	63	0	0	0	0	29	0	1	100	0	0	1	0	2	4	0	0	0	75	75	75	3.5	8	-.13363062	9	14.727006	15	14	Even Match	0	0	15	1	0	15	8	1	0	1
273	2	Bears	75	26	24	3	30dec2012 16:05:06	30dec2012 16:06:24	30dec2012 16:11:00	58	100	3	50	21	10	89	0	1	100	0	0	1	0	2	4	0	0	0	75	75	75	1.5	6	-.41602516	8	12.331766	2	0	Even Match	0	0	2	1	0	2	-1	0	0	1
276	0	Broncos								16	66	16	16	16	16		0	1	100	0	1	0	0	3	8	1	3	25	25	50	25	2.5	9	-.12126781	7	26.949238	0				1		0		0
278	0	Redskins								83	83	0	0	66	83		0	1	100	0	0	0	1	4	16	0	0	75	75	75	75	2	5	-.083333336	6	40.311226	0				1		0		0
278	1	Redskins	100	27	20	4.5	23dec2012 15:59:06	23dec2012 15:59:02	23dec2012 16:04:08	80	73	9	39	0	0	96	0	1	100	0	0	0	1	4	16	0	0	75	75	75	75	1.3333334	4	-.075377837	7	9.9555597	7	7	Even Match	0	0	7	1	0	7	2.5	1	0	1
278	2	Redskins	100	28	18	3	30dec2012 23:28:33	30dec2012 23:31:51	30dec2012 23:35:21	100	52	62	0	0	6	74	0	1	100	0	0	0	1	4	16	0	0	75	75	75	75		4	-.35355338	0	26.031752	10	7	Even Match	1	0	10	1	0	10	7	1	0	1
282	0	Eagles								0	33	0	0	33	66		0	0	50	0	0	1	0	3	12	3	3	25	25	75	75	4	7	-.15811388	5	47.325081	0				1		0		0
283	0	Seahawks								0	0	0	0	0	100		0	1	100	0	0	1	0	4	16	1	3	50	50	50	75		6	-.15811388	0	54.602894	0				1		0		0
283	1	Seahawks	100	42	13	2.5	23dec2012 23:33:29	23dec2012 23:46:17	23dec2012 23:49:42	55	83	0	0	0	0	82	0	1	100	0	0	1	0	4	16	1	3	50	50	50	75	2	5	0	6	8.6694613	29	28	Even Match	0	0	29	1	0	29	26.5	1	0	1
283	3	Seahawks	100	24	14	3	06jan2013 19:34:15	06jan2013 19:39:33	06jan2013 19:46:41	72	92	0	0	0	0	81	0	1	100	0	0	1	0	4	16	1	3	50	50	50	75	2	5	-.60302269	6	5.1404142	10	7	Even Match	1	0	10	1	0	10	7	1	0	1
283	4	Seahawks	100	28	30	-3	13jan2013 16:14:53	13jan2013 16:19:23	13jan2013 16:21:35	0	0	70	6	0	87	70	0	1	100	0	0	1	0	4	16	1	3	50	50	50	75	1	3	-.33333334	7	67.50708	-2	-7	Even Match	1	0	-2	0	1	0	1	1	1	0
284	0	Broncos								83	33	0	83	0	83		0	1	50	0	1	0	0	4	8	0	1	100	100	100	100	3	7	-.083333336	4	34.961842	0				1		0		0
284	1	Broncos	100	34	12	11	23dec2012 19:13:32	23dec2012 19:16:27	23dec2012 19:20:41	100	100	0	5	0	0	100	0	1	50	0	1	0	0	4	8	0	1	100	100	100	100	2.5	6	-.072168782	7	.67255718	22	21	Predicted Win	0	0	22	1	0	22	11	1	0	1
284	2	Broncos	100	38	3	17	30dec2012 19:15:09	30dec2012 19:25:07	30dec2012 19:29:31	100	100	0	28	1	0	100	0	1	50	0	1	0	0	4	8	0	1	100	100	100	100		4	-.35355338	0	.72772247	35	35	Predicted Win	0	0	35	1	0	35	18	1	0	1
285	0	Patriots								0	0	0	0	16	50		0	0	30	0	1	0	0	3	16	1	1	50	75	100	25		5	0	0	46.402512	0				1		0		0
285	1	Patriots	75	23	16	14	23dec2012 16:05:39	23dec2012 16:07:16	23dec2012 16:12:55	1	20	0	25	10	53	2	0	0	30	0	1	0	0	3	16	1	1	50	75	100	25	3	9	-.083333336	8	41.424942	7	7	Predicted Win	0	0	7	1	0	7	-7	0	0	1
285	4	Patriots	100	41	28	9.5	13jan2013 19:57:43	13jan2013 19:58:29	13jan2013 20:01:00	20	49	0	0	0	0	0	0	0	30	0	1	0	0	3	16	1	1	50	75	100	25	0	2	-.33333334	2	19.06768	13	7	Predicted Win	1	0	13	1	0	13	3.5	1	0	1
285	5	Patriots	100	13	28	7.5	20jan2013 21:48:34	20jan2013 21:50:00	20jan2013 21:53:39	0	0	15	0	100	100	0	0	0	30	0	1	0	0	3	16	1	1	50	75	100	25	1	3	-.2773501	10	80.550468	-15	-21	Predicted Win	1	0	-15	0	1	0	-22.5	0	0	1
286	0	Bills								0	0	50	0	0	100		0	0	30	0	1	0	0	4	16	3	3	50	75	100	75	2	5	0	3	66.043793	0				1		0		0
286	1	Bills	100	10	24	-4.5	23dec2012 16:14:24	23dec2012 16:14:43	23dec2012 16:20:31	0	6	64	1	62	95	17	0	0	30	0	1	0	0	4	16	3	3	50	75	100	75	1.6666666	5	0	8	80.804169	-14	-14	Even Match	0	0	-14	0	1	0	-9.5	0	1	0
287	0	Redskins								0	50	0	0	0	0		0	1	75	0	0	0	1	4	12	3	3	0	50	50	50	4	9	-.15811388	5	20.873081	0				1		0		0
287	1	Redskins	100	27	20	4.5	23dec2012 15:59:06	23dec2012 15:59:55	23dec2012 16:05:56	100	100	0	51	0	0	76	0	1	75	0	0	0	1	4	12	3	3	0	50	50	50	3	7	-.15811388	8	.33258215	7	7	Even Match	0	0	7	1	0	7	2.5	1	0	1
287	3	Redskins	100	14	24	-3	06jan2013 19:34:15	06jan2013 19:45:06	06jan2013 19:50:30	0	0	26	0	0	100	54	0	1	75	0	0	0	1	4	12	3	3	0	50	50	50		4	-.35355338	0	60.552166	-10	-14	Even Match	1	0	-10	0	1	0	-7	0	1	0
288	0	Giants								33	33	0	0	0	16		0	1	100	0	0	0	1	3	12	3	7	50	25	50	50	2	4	0	3	24.77919	0				1		0		0
288	1	Giants	75	14	33	2.5	23dec2012 19:31:00	23dec2012 19:32:08	23dec2012 19:39:04	0	0	66	0	60	81	0	0	1	100	0	0	0	1	3	12	3	7	50	25	50	50	2	5	0	3	78.728989	-19	-21	Even Match	0	0	-19	0	1	0	-21.5	0	0	1
288	2	Giants	75	42	7	6.5	30dec2012 15:51:59	30dec2012 15:55:48	30dec2012 15:59:13	90	100	0	0	0	0	85	0	1	100	0	0	0	1	3	12	3	7	50	25	50	50	1.5	4	-.2773501	8	1.7134533	35	35	Even Match	0	0	35	1	0	35	28.5	1	0	1
290	0	Seahawks								0	66	0	16	0	0		0	0	50	0	1	0	0	4	16	3	3	75	50	100	50	2.5	6	-.072168782	7	17.515102	0				1		0		0
290	1	Seahawks	100	42	13	2.5	23dec2012 23:33:29	23dec2012 23:37:42	23dec2012 23:40:16	100	100	0	0	0	0	37	0	0	50	0	1	0	0	4	16	3	3	75	50	100	50	2.5	6	-.072168782	7	.70951116	29	28	Even Match	0	0	29	1	0	29	26.5	1	0	1
290	3	Seahawks	100	24	14	3	06jan2013 19:34:15	06jan2013 19:36:13	06jan2013 19:38:35	90	100	0	0	0	0	54	0	0	50	0	1	0	0	4	16	3	3	75	50	100	50	1.3333334	4	-.26726124	11	1.7134533	10	7	Even Match	1	0	10	1	0	10	7	1	0	1
290	4	Seahawks	100	28	30	-3	13jan2013 16:14:53	13jan2013 16:15:00	13jan2013 16:16:48	0	0	26	0	0	100	55	0	0	50	0	1	0	0	4	16	3	3	75	50	100	50	1.6666666	5	-.25819889	12	60.552166	-2	-7	Even Match	1	0	-2	0	1	0	1	1	1	0
291	0	Patriots								100	100	0	0	0	0		0	0	100	0	0	0	1	4	16	12	12	100	50	100	100	1	5	0	2	.70951116	0				1		0		0
294	0	49ers								83	33	16	66	50	83		0	1	100	0	0	1	0	4	16	3	1	75	75	75	75	3	8	-.13363062	4	50.006226	0				1		0		0
294	5	49ers	100	28	24	4	20jan2013 18:03:33	20jan2013 18:13:50	20jan2013 18:17:38	45	71	8	23	13	14	46	0	1	100	0	0	1	0	4	16	3	1	75	75	75	75	.66666669	2	-.13867505	8	19.995539	4	0	Even Match	1	0	4	1	0	4	0	0	0	1
297	0	Broncos								0	0	50	0	100	100		0	1	50	0	0	1	0	4	16	3	3	25	75	100	100	2	11	-.22613351	3	88.559097	0				1		0		0
300	0	Falcons								100	66	0	66	50	66		0	0	75	0	0	1	0	4	16	3	7	0	50	75	100		19	-.28867513	8	33.943535	0				1		0		0
300	4	Falcons	100	30	28	3	13jan2013 16:14:53	13jan2013 16:16:10	13jan2013 16:24:33	95	100	2	6	4	3	100	0	0	75	0	0	1	0	4	16	3	7	0	50	75	100	2	6	-.53452247	4	3.2335553	2	0	Even Match	1	0	2	1	0	2	-1	0	0	1
300	5	Falcons	75	24	28	-4	20jan2013 18:03:33	20jan2013 18:04:10	20jan2013 18:06:54	25	12	100	25	100	100	19	0	0	75	0	0	1	0	4	16	3	7	0	50	75	100	2	6	-.5	14	94.87558	-4	-7	Even Match	1	0	-4	0	1	0	0	0	1	0
301	0	Redskins								16	66	0	0	0	50		0	1	50	1	0	0	0	3	8	0	0	25	25	50	75	1.5	5	0	5	27.82988	0				1		0		0
301	3	Redskins	75	14	24	-3	06jan2013 19:34:15	06jan2013 19:36:54	06jan2013 19:41:51	0	11	100	0	70	100	51	0	1	50	1	0	0	0	3	8	0	0	25	25	50	75	1.3333334	4	-.51639777	12	91.018097	-10	-14	Even Match	1	0	-10	0	1	0	-7	0	1	0
303	0	Vikings								83	66	0	83	0	33		0	1	75	0	1	0	0	4	16	1	1	50	75	100	75	2	5	0	3	16.477072	0				1		0		0
303	3	Vikings	100	10	24	-11	05jan2013 23:06:32	05jan2013 23:12:50	05jan2013 23:16:58	0	19	90	0	0	92	52	0	1	75	0	1	0	0	4	16	1	1	50	75	100	75	2	5	-.41602516	4	69.460884	-14	-14	Predicted Loss	1	0	-14	0	1	0	-3	0	1	0
[truncated: 15 more columns]
